# Supplementary material for: Genetic diversity evaluation of Luculia yunnanensis, a vulnerable species endemic to Yunnan, Southwestern China based on morphological traits and EST-SSR markers
Source: Front Plant Sci. 2024 Aug 14;15:1428364. doi: 10.3389/fpls.2024.1428364 (PMC11363074; doi:10.3389/fpls.2024.1428364)
Supplement: Supplementary file 3 [file Table2.xlsx]

## Sheet: Sheet1
sample	pop	N3		N6		N9		N10		Z13		N22		N24		Z31		Z32		Z33		Z36		Z38		N41		Z48		Z50		Z54		X70
GDX01	GDX	273	273	216	216	145	145	194	194	123	132	165	170	276	276	237	237	114	122	264	264	219	219	112	112	213	213	221	221	148	152	212	212	247	247
GDX02	GDX	273	273	216	216	145	151	194	194	132	132	170	180	276	276	237	240	122	122	264	264	219	219	112	118	213	213	221	221	148	152	212	212	247	247
GDX03	GDX	267	273	216	216	145	145	194	194	123	132	170	180	276	276	237	240	122	122	264	264	219	219	112	118	213	213	221	221	148	152	212	212	247	247
GDX04	GDX	267	273	216	216	145	145	194	194	123	132	170	180	276	276	237	240	122	122	264	264	219	219	112	118	213	213	221	221	148	152	212	212	247	247
GDX05	GDX	267	273	216	216	145	151	194	194	132	132	170	180	276	276	237	240	122	122	264	264	219	219	112	112	213	213	221	221	144	148	212	216	247	247
GDX06	GDX	267	273	216	216	145	145	194	194	132	132	170	180	276	276	240	240	122	122	264	264	219	219	112	112	213	213	221	221	148	152	212	216	247	247
GDX07	GDX	267	273	216	216	145	145	194	194	123	132	170	170	276	276	237	240	122	122	264	264	219	219	112	118	213	213	221	225	146	152	212	212	247	247
GDX08	GDX	273	273	216	216	145	145	194	194	123	132	170	170	276	276	240	240	122	122	264	264	219	219	112	118	213	213	221	221	148	152	212	216	247	247
GDX09	GDX	279	279	216	216	145	151	194	194	123	132	170	170	276	276	237	240	114	122	264	267	219	219	112	112	213	213	221	221	148	152	212	216	247	247
GDX10	GDX	261	273	216	216	145	145	194	194	123	132	170	170	276	276	240	240	114	122	264	264	211	219	112	112	213	213	221	221	146	148	212	216	247	247
GDX11	GDX	267	267	216	216	145	151	194	194	117	132	170	170	276	276	237	240	122	122	264	264	219	219	112	118	213	213	221	221	148	152	212	212	247	247
GDX12	GDX	273	279	216	216	145	151	194	194	123	132	170	170	276	276	237	240	122	122	261	264	219	219	112	112	213	213	221	221	148	152	212	212	247	247
GDX13	GDX	261	279	216	216	145	145	194	194	126	132	165	170	276	276	240	240	122	122	264	264	211	219	112	118	213	213	221	221	148	148	212	212	247	250
GDX14	GDX	273	279	216	216	145	145	194	194	123	132	165	165	276	276	240	240	114	122	264	264	211	219	112	118	213	213	221	225	146	148	212	212	247	250
GDX15	GDX	273	279	216	216	145	151	194	194	126	132	165	165	276	276	237	240	122	122	264	264	219	219	112	112	213	213	221	221	148	152	212	216	247	247
GDX16	GDX	273	279	216	216	151	151	194	194	132	132	165	165	276	276	240	240	122	122	264	264	211	219	112	112	213	213	221	221	148	152	212	212	247	247
GDX17	GDX	267	273	216	216	145	151	194	194	132	132	165	170	276	276	237	240	122	122	264	264	211	219	112	112	213	213	221	221	148	152	212	212	247	247
GDX18	GDX	273	279	216	216	145	151	194	194	132	132	165	170	276	276	237	240	122	122	264	264	219	219	112	118	213	213	221	221	148	148	212	212	247	247
GDX19	GDX	267	273	216	216	145	151	194	194	123	132	170	170	276	276	237	240	122	122	261	264	219	219	112	118	213	213	221	225	148	152	212	216	247	247
GDX20	GDX	273	273	216	216	145	145	194	194	132	132	170	170	276	276	237	240	122	122	264	264	219	219	112	118	213	213	221	221	148	152	212	216	247	247
GDX21	GDX	273	273	216	216	145	151	194	194	123	132	170	170	276	276	237	240	122	122	264	264	219	219	112	112	213	213	221	221	148	152	212	216	247	247
GDX22	GDX	267	273	216	216	145	151	194	194	123	132	170	170	276	276	237	240	122	122	264	264	219	219	112	112	213	213	221	221	148	152	212	216	247	247
GDX23	GDX	267	273	216	216	145	151	194	194	123	132	165	170	276	276	237	240	114	122	264	264	219	219	112	112	213	213	221	221	148	152	212	216	247	247
GDX24	GDX	267	273	216	216	145	151	194	194	123	132	170	170	276	276	231	237	122	122	264	264	219	219	112	112	213	213	221	221	148	152	212	216	247	247
GDX25	GDX	267	273	216	216	145	151	194	194	123	132	165	170	276	276	237	240	114	122	264	264	219	219	112	118	213	213	221	221	148	148	212	212	247	247
GDX26	GDX	273	279	216	216	145	151	194	194	132	132	165	165	276	276	237	240	122	122	264	264	219	219	112	118	213	213	221	221	148	152	212	216	247	247
GDX27	GDX	267	273	216	216	145	151	194	194	123	132	170	170	276	276	237	240	122	122	264	264	219	219	112	112	213	213	221	221	148	152	212	216	247	247
GDX28	GDX	273	273	216	216	145	151	194	194	132	132	165	165	276	276	231	240	114	122	261	261	219	219	112	112	213	213	221	221	148	152	212	212	247	247
GDX29	GDX	273	279	216	216	145	145	194	194	123	132	165	165	276	276	240	240	114	122	264	264	219	219	112	112	213	213	221	221	148	152	212	216	247	247
GCG01	GCG	267	273	216	224	145	151	194	194	123	132	170	170	276	276	228	228	122	122	255	264	219	219	112	115	213	213	221	225	148	148	212	216	250	250
GCG02	GCG	273	273	212	212	145	151	194	194	132	132	170	170	276	276	231	231	122	122	264	264	219	219	112	115	213	213	221	221	148	154	212	212	250	250
GCG03	GCG	279	279	216	216	145	151	194	194	123	132	165	165	276	276	231	231	122	122	264	264	215	219	112	115	213	213	221	221	148	152	212	212	250	250
GCG04	GCG	267	273	212	216	145	151	194	194	132	132	170	170	276	276	231	237	122	122	264	264	219	219	112	115	213	213	221	221	148	154	212	212	250	250
GCG05	GCG	267	273	216	216	145	151	194	194	132	132	170	170	276	276	228	231	122	122	264	264	219	219	112	118	213	213	221	221	148	148	212	212	250	250
GCG06	GCG	267	273	212	216	145	151	194	194	132	132	165	165	276	276	231	237	118	118	261	264	219	219	112	112	213	213	221	221	148	152	212	216	247	250
GCG07	GCG	267	273	216	224	145	151	194	194	117	132	170	175	276	276	228	231	122	122	264	264	219	219	112	112	213	213	221	221	148	148	212	216	247	250
GCG08	GCG	273	279	216	216	151	151	194	194	123	132	165	175	276	276	228	231	114	114	264	264	219	219	112	112	213	213	221	221	146	148	212	216	247	247
GCG09	GCG	273	273	216	216	151	151	194	194	132	132	165	170	276	276	228	231	122	122	264	264	219	219	112	112	213	213	221	221	148	152	212	212	247	250
GCG10	GCG	273	273	216	216	145	151	194	194	123	132	165	165	276	276	228	231	114	122	264	264	219	219	112	112	213	213	221	225	146	148	216	216	250	250
GCG11	GCG	273	279	216	220	151	151	194	194	123	132	170	170	276	276	231	231	118	118	255	255	219	219	112	112	213	213	221	221	148	152	212	216	250	250
GCG12	GCG	273	279	216	216	145	145	194	194	132	132	165	175	276	276	228	231	114	122	264	264	219	219	112	112	213	213	221	221	146	148	216	216	250	250
GCG13	GCG	273	273	212	224	145	151	194	194	123	132	165	175	276	276	231	237	122	122	264	264	219	219	112	115	213	213	221	221	148	154	212	216	247	250
GCG14	GCG	273	273	212	216	151	151	194	194	123	132	165	165	276	276	231	231	122	122	261	264	219	219	112	118	213	213	221	221	146	148	216	216	247	247
GCG15	GCG	273	273	216	216	145	151	194	194	123	132	165	165	276	276	237	237	122	122	264	264	219	219	112	118	213	213	221	225	146	148	212	212	250	250
GCG16	GCG	279	279	216	216	151	151	194	194	117	132	175	175	276	276	228	237	122	122	264	264	219	219	112	118	213	213	221	221	146	148	212	216	250	250
GCG17	GCG	267	267	216	224	151	151	194	194	117	132	170	170	276	276	228	231	122	122	264	264	215	219	112	118	213	213	221	225	146	148	216	216	250	250
GCG18	GCG	267	273	216	216	145	151	194	194	123	132	170	170	276	276	231	240	122	122	264	264	219	219	112	112	213	213	221	221	148	152	212	212	247	247
GCG19	GCG	267	273	216	216	145	151	194	194	123	132	170	170	276	276	237	240	122	122	264	264	219	219	112	112	213	213	221	221	148	152	212	212	247	247
GCG20	GCG	273	273	216	224	151	151	194	194	117	132	165	170	276	276	237	237	122	122	264	264	219	219	112	118	213	213	221	221	146	148	212	212	250	250
GCG21	GCG	267	273	212	216	145	151	194	194	132	132	165	170	276	276	228	237	122	122	264	264	219	219	112	112	213	213	221	225	148	148	212	216	250	250
GCG22	GCG	267	273	212	224	145	151	194	194	117	132	165	175	276	276	228	231	122	122	264	264	219	219	112	112	213	213	221	221	148	152	212	212	250	250
GCG23	GCG	267	273	216	216	151	151	194	194	132	132	165	170	276	276	231	237	122	122	264	264	219	219	112	112	213	213	221	221	148	148	212	216	247	250
GCG24	GCG	273	273	216	216	151	151	194	194	117	132	170	175	276	276	228	231	122	122	264	264	219	219	112	112	213	213	221	221	148	152	212	212	247	250
GCG25	GCG	267	273	216	216	151	151	194	194	123	132	165	165	276	276	228	231	122	122	264	264	219	219	112	118	213	213	219	221	148	152	212	212	250	250
GCG26	GCG	273	273	224	224	145	151	194	194	117	132	170	175	276	276	228	237	122	122	264	264	219	219	112	118	213	213	221	225	148	148	212	212	247	250
FMM01	FMM	273	273	216	216	145	151	194	194	123	132	165	170	276	276	231	237	122	122	264	264	215	219	112	112	213	213	221	221	148	154	212	216	250	250
FMM02	FMM	267	267	216	216	145	151	194	194	132	132	165	170	276	276	228	228	122	122	264	264	219	219	112	112	213	213	221	225	148	152	212	212	250	250
FMM03	FMM	267	273	216	216	145	151	194	194	123	132	170	170	276	276	228	237	122	122	264	264	219	219	112	112	213	213	221	221	148	154	212	212	250	250
FMM04	FMM	273	279	216	224	145	151	194	194	123	132	170	170	276	280	228	237	122	122	264	264	219	219	112	112	213	213	221	225	148	154	216	216	247	250
FMM05	FMM	273	279	216	216	151	151	194	224	132	132	170	175	276	280	228	237	122	122	261	264	219	219	112	115	213	217	217	217	148	152	212	216	244	250
FMM06	FMM	273	279	216	216	145	151	194	194	123	132	165	170	276	276	228	237	122	122	264	264	219	219	112	112	213	213	221	221	148	154	212	216	247	250
FMM07	FMM	273	279	216	224	145	151	194	194	123	132	170	175	276	276	228	228	122	122	264	264	219	219	112	112	213	213	221	221	148	154	212	212	250	250
FMM08	FMM	273	273	216	216	145	145	194	224	123	132	170	175	276	276	231	237	122	122	264	264	215	219	112	112	213	221	223	223	148	154	216	216	244	244
FMM09	FMM	267	273	216	216	145	145	194	194	123	132	165	170	276	276	228	231	122	122	264	264	219	219	112	112	213	213	221	221	148	152	212	212	250	250
FMM10	FMM	273	279	216	216	151	151	194	224	132	132	170	175	276	276	228	231	122	122	264	264	219	219	112	112	213	213	223	223	148	154	216	216	250	250
FMM11	FMM	273	279	216	216	151	151	194	194	132	132	165	170	276	276	231	231	122	122	264	264	219	219	112	112	213	213	221	221	146	154	212	216	250	250
FMM12	FMM	267	273	216	216	151	151	194	194	123	132	170	170	276	276	228	231	122	122	264	264	215	219	112	112	213	213	221	221	148	152	212	212	247	250
FMM13	FMM	273	279	216	216	151	151	194	194	132	132	165	170	276	276	228	237	122	122	264	264	219	219	112	112	213	213	221	221	148	152	212	216	250	250
FMM14	FMM	273	279	216	216	151	151	194	194	132	132	170	175	276	280	231	237	122	122	264	264	219	219	112	112	213	213	221	223	148	154	212	216	247	247
FMM15	FMM	273	279	216	216	145	151	194	194	132	132	165	175	280	280	237	237	114	122	264	264	219	219	112	115	213	213	221	221	148	154	212	212	247	250
FMM16	FMM	273	273	216	216	145	151	194	194	123	132	165	175	276	276	228	237	122	122	264	264	219	219	112	112	213	213	221	221	148	152	212	212	247	250
FMM17	FMM	273	273	216	216	151	151	194	194	123	132	165	175	276	276	237	237	122	122	264	264	215	219	112	118	213	213	221	225	144	148	212	212	247	250
FMM18	FMM	267	273	216	224	151	151	194	194	132	132	170	170	276	276	237	237	122	122	255	264	219	219	112	118	213	213	221	221	144	148	212	216	250	250
FMM19	FMM	273	273	216	216	151	151	194	194	132	132	165	170	276	280	237	237	122	122	264	264	219	219	112	115	213	213	221	221	148	152	212	212	250	250
FMM20	FMM	273	273	224	224	145	151	194	194	132	132	165	175	276	276	228	237	122	122	264	264	219	219	112	118	213	213	221	221	146	148	212	212	247	250
FMM21	FMM	267	273	216	224	145	151	194	194	132	132	170	170	272	276	237	237	122	122	255	264	219	219	109	112	209	209	223	223	148	152	216	216	250	250
FMM22	FMM	267	273	216	216	151	151	194	194	117	132	170	170	276	276	231	234	122	122	261	261	215	219	112	112	213	213	221	221	148	152	212	212	250	250
FMM23	FMM	273	279	216	216	145	151	194	194	123	132	165	170	276	276	228	231	122	122	261	261	219	219	112	112	213	213	221	225	148	152	212	212	250	250
FMM24	FMM	267	273	216	216	145	151	194	194	132	132	170	170	276	276	228	237	122	122	255	264	219	219	112	112	213	213	221	221	148	152	212	212	247	250
FMM25	FMM	273	273	216	224	151	151	194	194	132	132	170	170	276	276	228	228	122	122	264	264	219	219	112	112	213	213	221	221	148	152	212	212	247	250
FMM26	FMM	273	273	220	224	151	151	194	194	132	132	170	175	276	276	228	231	122	122	264	264	219	219	112	112	213	213	221	221	148	152	212	212	250	250
FMM27	FMM	267	273	216	224	151	151	194	194	132	132	170	175	276	276	231	237	122	122	264	264	219	219	112	112	213	213	221	221	148	154	212	212	250	250
FMM28	FMM	273	279	216	224	145	145	194	194	117	132	165	175	276	276	228	231	122	122	264	264	219	219	112	112	213	213	221	225	148	152	212	212	247	250
FMM29	FMM	273	279	216	216	151	151	194	194	132	132	165	170	276	276	228	240	122	122	264	264	219	219	112	112	213	213	219	219	148	152	212	212	250	250
FPK01	FPK	273	273	216	216	145	187	194	224	123	132	170	175	276	276	237	237	122	122	264	270	211	219	112	112	213	213	221	221	148	154	212	216	247	247
FPK02	FPK	273	273	216	216	145	145	194	194	132	132	165	170	276	276	237	237	122	122	264	264	211	219	112	112	213	213	221	221	148	152	216	216	244	244
FPK03	FPK	267	273	216	224	145	145	194	194	132	132	170	170	276	276	237	237	122	122	264	264	211	219	112	112	213	213	221	221	148	152	216	216	244	244
FPK04	FPK	273	273	212	216	127	187	194	194	123	132	165	175	276	276	237	237	122	122	264	264	211	219	112	118	217	217	221	221	146	148	216	216	247	247
FPK05	FPK	273	273	216	216	145	145	194	224	132	132	165	175	276	276	237	237	122	122	264	264	211	215	112	118	213	213	221	221	146	148	216	216	244	247
FPK06	FPK	267	267	216	216	145	151	194	224	132	132	170	175	276	276	237	237	122	122	264	264	211	211	112	112	213	213	221	223	148	154	216	216	247	250
FPK07	FPK	273	273	216	216	145	163	194	194	132	132	165	175	276	276	237	237	122	122	264	264	219	219	112	112	213	213	221	221	148	152	216	216	247	247
FPK08	FPK	273	279	216	216	145	175	194	224	132	132	170	175	276	276	237	237	122	122	264	264	211	219	112	112	213	213	221	221	148	152	216	216	250	250
FPK09	FPK	273	273	216	224	151	187	224	224	132	132	170	170	276	276	237	237	122	122	264	264	211	211	112	112	213	213	221	221	148	152	212	216	247	250
FPK10	FPK	273	279	216	216	145	163	194	194	132	132	165	170	276	276	237	237	122	122	264	264	219	219	112	112	213	213	221	221	148	154	216	216	247	247
FPK11	FPK	267	273	224	224	145	175	194	224	123	132	170	170	276	276	237	237	122	122	264	264	211	219	112	112	213	213	221	221	148	154	216	216	247	250
FPK12	FPK	273	279	216	224	145	145	194	224	132	132	165	170	276	276	237	237	114	122	264	264	211	219	112	112	213	213	221	221	148	152	216	216	247	250
FPK13	FPK	273	279	216	224	145	151	194	224	132	132	165	175	276	276	237	237	122	122	264	264	211	219	112	112	213	213	221	223	148	152	216	216	247	250
FPK14	FPK	267	273	216	224	145	151	194	224	132	132	170	175	276	276	237	237	122	122	264	264	211	219	112	112	213	213	221	223	148	154	216	216	247	250
FPK15	FPK	267	273	216	224	145	151	194	224	132	132	170	170	276	276	237	237	122	122	267	267	211	211	112	112	213	213	221	221	148	152	216	216	244	250
FPK16	FPK	273	279	216	224	151	151	194	194	132	132	165	170	276	276	228	237	122	122	267	267	215	219	112	118	213	213	221	221	148	154	212	216	250	250
FPK17	FPK	267	273	212	224	145	145	194	224	126	132	165	170	276	276	237	237	122	122	264	264	211	219	112	115	213	213	221	223	148	152	212	216	247	250
FPK18	FPK	267	273	212	224	145	163	194	224	132	132	170	170	276	276	237	237	122	122	264	264	219	219	112	115	213	213	221	221	148	148	216	216	247	250
FPK19	FPK	267	267	216	224	145	145	194	224	123	132	170	170	276	276	237	237	122	122	264	264	211	219	112	112	213	213	221	221	146	148	216	216	247	247
FPK20	FPK	267	273	216	216	187	187	194	224	132	132	165	170	276	276	231	237	122	122	264	264	219	219	112	112	213	213	221	221	148	152	216	216	247	250
FPK21	FPK	273	273	216	216	145	151	194	224	123	132	170	170	276	276	237	237	122	122	264	264	211	215	112	118	213	213	221	221	148	152	216	216	247	250
FPK22	FPK	267	273	216	224	151	163	194	194	123	132	170	175	276	276	237	237	122	122	255	264	211	219	112	112	213	213	221	221	144	148	216	216	247	250
FPK23	FPK	273	273	216	224	151	151	224	224	132	132	165	165	276	276	237	237	122	122	264	264	219	219	112	118	213	213	221	221	148	152	212	216	247	247
FPK24	FPK	273	279	216	224	145	187	194	194	132	132	165	170	276	276	237	240	122	122	264	264	219	219	112	118	213	213	221	221	148	152	216	216	250	250
FPK25	FPK	273	279	216	216	145	151	194	194	132	132	170	170	276	276	237	237	122	122	264	264	211	219	112	112	213	213	221	221	148	152	216	216	247	250
FPK26	FPK	273	279	216	216	127	187	194	194	132	132	165	170	276	276	237	237	122	122	264	264	215	219	112	112	213	213	221	221	148	152	216	216	244	247
LLO01	LLO	267	273	212	216	145	151	194	224	132	132	170	175	276	276	237	237	122	122	264	264	219	219	112	112	213	213	221	221	148	148	212	216	247	250
LLO02	LLO	267	267	216	216	145	151	194	224	132	132	165	170	268	276	228	237	122	122	264	264	215	219	109	112	213	213	219	221	148	152	212	212	247	247
LLO03	LLO	267	273	224	224	145	151	194	194	132	132	170	170	268	276	237	237	122	122	264	264	215	219	112	112	213	213	219	221	148	152	216	216	247	247
LLO04	LLO	273	279	216	224	145	145	194	194	123	132	165	170	276	276	237	237	114	122	261	264	215	219	112	112	213	213	221	225	148	152	216	216	247	247
LLO05	LLO	267	273	216	224	145	145	194	194	132	132	170	175	276	276	231	240	122	122	264	264	215	219	112	115	213	213	219	225	148	152	212	216	247	247
LLO06	LLO	267	273	216	224	145	145	194	194	132	132	170	170	276	276	237	237	122	122	264	264	215	219	112	115	213	217	221	225	146	148	216	216	244	250
LLO07	LLO	273	279	216	224	145	145	194	224	132	132	165	175	276	276	234	240	114	114	261	264	215	219	112	112	213	217	221	225	148	152	216	216	247	250
LLO08	LLO	273	279	224	224	145	151	194	224	123	132	165	175	276	276	228	237	114	114	264	264	211	219	112	112	213	217	221	225	148	152	212	216	247	247
LLO09	LLO	273	279	224	224	145	145	194	224	132	132	165	175	276	276	237	237	114	114	264	264	211	219	112	112	213	217	221	225	148	154	216	216	247	250
LLO10	LLO	267	267	224	224	145	151	194	224	132	132	165	170	276	276	237	237	122	122	264	264	219	219	112	112	213	217	221	225	148	154	216	216	247	250
LLO11	LLO	267	267	216	216	145	145	194	224	120	132	170	170	272	272	237	237	122	122	264	264	215	219	112	112	213	213	217	221	148	154	216	216	250	250
LLO12	LLO	267	273	216	216	145	151	194	194	132	132	165	170	276	276	228	237	122	122	264	264	215	219	112	115	213	213	221	221	148	148	212	216	247	247
LLO13	LLO	267	273	216	224	145	145	194	224	132	132	175	175	272	276	237	237	122	122	264	264	211	219	112	112	213	213	221	221	148	152	212	212	247	247
LLO14	LLO	267	273	216	224	145	145	194	224	132	132	170	175	276	276	237	237	122	122	267	267	215	219	112	112	213	213	221	225	148	148	216	216	247	250
LLO15	LLO	267	273	216	224	145	151	194	194	132	132	170	175	276	276	237	237	122	122	264	264	215	219	112	115	213	217	221	225	148	152	216	216	244	250
LLO16	LLO	273	273	216	224	145	151	194	224	132	132	170	170	276	276	228	237	122	122	264	264	211	219	112	112	213	217	221	225	148	152	212	216	247	250
LLO17	LLO	267	273	216	216	145	151	194	224	132	132	170	180	276	276	228	237	122	122	264	264	219	219	112	112	213	213	221	221	148	152	216	216	247	250
LLO18	LLO	273	273	216	224	145	151	194	224	126	132	165	170	276	276	237	237	122	122	264	264	215	219	112	115	213	213	221	221	148	152	216	216	247	247
LLO19	LLO	267	267	216	224	145	151	194	224	126	132	170	170	276	276	237	237	118	122	264	264	215	219	112	115	213	213	221	221	148	152	216	216	247	247
LLO20	LLO	267	273	216	216	145	151	194	224	132	132	170	170	272	276	234	237	122	122	264	264	219	219	112	115	209	213	215	221	146	148	212	216	244	247
LLO21	LLO	267	267	216	224	145	145	194	194	126	132	170	170	276	276	228	237	122	122	264	264	215	219	112	115	213	213	221	225	148	154	216	216	247	250
LLO22	LLO	267	267	216	216	145	151	194	224	123	132	165	170	276	276	231	237	122	122	264	264	219	219	112	115	213	213	221	221	148	152	216	216	247	247
LLO23	LLO	267	273	216	216	145	145	194	224	132	132	170	175	276	276	237	237	122	122	264	264	211	215	112	115	213	213	221	223	148	152	212	216	247	250
LLO24	LLO	273	273	216	216	145	145	194	194	132	132	170	170	276	276	237	237	122	122	267	267	215	219	112	112	197	213	221	221	146	148	212	216	247	247
LLO25	LLO	267	273	216	224	145	151	194	194	132	132	165	175	276	276	234	237	114	122	264	264	211	219	112	112	213	217	221	221	148	152	216	216	247	247
LLO26	LLO	267	273	216	216	145	151	194	194	132	132	165	170	272	280	237	237	122	122	261	270	215	219	112	115	213	213	221	221	146	148	212	212	247	250
LLO27	LLO	267	273	212	216	145	151	194	224	132	132	165	170	276	276	231	237	122	122	264	264	215	219	112	112	213	213	221	221	148	152	212	216	244	247
LLO28	LLO	273	273	216	224	145	151	194	194	123	132	170	175	276	276	237	240	122	122	264	264	215	219	112	115	213	213	221	221	148	154	212	216	247	250
LLO29	LLO	267	273	216	216	145	145	194	194	132	132	165	170	272	276	237	240	122	122	264	264	219	219	112	112	213	213	221	223	146	148	216	216	247	250
LLO30	LLO	267	273	216	220	151	151	194	194	132	132	165	170	272	272	228	237	122	122	264	264	211	211	112	112	213	213	225	225	146	148	212	216	247	247
LCM01	LCM	273	279	212	224	145	151	194	194	132	132	165	170	276	276	237	237	122	122	261	264	219	219	112	112	213	213	221	221	148	152	216	216	247	250
LCM02	LCM	273	273	216	224	145	145	194	224	132	132	165	170	276	276	231	237	122	122	264	264	211	211	109	112	213	213	219	221	146	148	216	216	244	244
LCM03	LCM	267	273	224	228	145	151	194	224	132	132	170	170	276	276	237	237	122	122	264	264	219	219	112	112	213	213	221	225	148	152	216	216	247	250
LCM04	LCM	273	279	224	224	145	151	194	224	132	132	170	170	276	276	231	237	114	122	264	264	211	219	112	112	205	213	221	225	148	152	216	216	247	250
LCM05	LCM	267	273	224	224	145	151	194	224	132	132	170	170	276	276	231	237	122	122	264	264	211	219	112	112	205	213	217	221	148	152	212	216	247	250
LCM06	LCM	273	273	216	224	151	151	194	224	123	132	170	170	276	276	237	240	122	122	264	264	219	219	112	112	213	213	221	225	148	152	216	216	250	250
LCM07	LCM	267	273	224	224	151	151	194	224	123	132	170	170	276	276	237	237	122	122	264	264	219	219	112	112	213	213	221	225	148	154	216	216	247	250
LCM08	LCM	273	273	216	216	151	151	194	194	132	132	170	170	268	276	234	237	122	122	264	264	219	219	112	112	209	209	219	221	148	148	216	216	244	247
LCM09	LCM	261	279	216	224	151	151	194	224	132	132	165	170	276	276	237	237	122	122	264	264	211	219	112	115	213	213	221	221	148	152	216	216	247	247
LCM10	LCM	267	267	224	224	145	175	194	224	132	132	170	170	276	276	237	237	122	122	264	264	219	219	112	112	213	213	221	225	148	152	212	216	247	247
LCM11	LCM	267	267	216	224	145	145	194	224	120	126	170	170	276	280	237	237	122	122	264	264	211	219	112	115	213	213	215	221	148	152	216	216	244	244
LCM12	LCM	273	273	224	228	145	151	224	224	120	132	165	170	276	276	237	237	122	122	264	264	211	219	112	112	213	213	221	225	148	152	216	216	244	250
LCM13	LCM	273	279	224	224	145	145	194	224	132	132	165	165	276	276	237	237	114	122	264	264	211	219	112	112	213	213	221	221	148	152	216	216	247	250
LCM14	LCM	273	273	216	216	145	151	194	224	132	132	165	170	276	276	237	237	122	122	261	264	211	219	112	112	213	213	221	225	148	152	216	216	244	247
LCM15	LCM	273	273	212	216	145	151	194	194	117	132	165	170	276	276	237	240	122	122	261	264	219	219	112	112	213	213	221	225	148	152	212	216	247	247
LCM16	LCM	273	279	224	228	145	151	194	224	132	132	165	170	276	276	237	240	122	122	261	264	211	219	112	112	213	217	221	225	148	152	216	216	244	250
LCM17	LCM	273	279	216	224	151	169	194	194	123	132	165	165	272	276	237	237	122	122	261	264	219	219	112	112	213	213	221	225	148	152	216	216	244	244
LCM18	LCM	273	273	220	220	151	163	224	224	132	132	165	165	272	276	234	234	114	114	261	267	219	219	112	112	213	213	221	221	148	152	216	216	247	247
LCM19	LCM	267	273	212	224	145	151	194	224	132	132	170	170	276	276	237	237	122	122	264	264	219	219	112	112	213	213	221	221	148	152	216	216	244	247
LCM20	LCM	273	279	216	224	145	151	194	194	117	132	165	165	276	276	237	237	122	122	264	264	211	219	112	112	213	213	221	225	148	152	216	216	244	247
LCM21	LCM	267	273	224	224	151	151	194	194	120	132	165	170	276	276	237	237	122	122	264	264	211	219	112	112	213	213	221	221	148	152	216	216	244	247
LCM22	LCM	267	273	216	216	151	157	194	194	132	132	165	170	276	276	237	237	122	122	264	264	215	219	112	112	213	213	221	225	148	152	216	216	247	250
LCM23	LCM	273	279	224	224	151	151	194	224	132	132	165	170	276	276	237	237	122	122	264	264	211	219	112	112	213	213	221	221	148	152	216	216	244	247
LCM24	LCM	273	279	216	224	151	151	194	224	132	132	165	170	276	276	237	237	122	122	264	264	211	219	112	112	213	213	221	225	148	152	216	216	244	247

## Sheet: GD
1	164	6	29	26	29	26	30	24	1	164
	Sheet1	Codominant Genotypic Distance	GDX	GCG	FMM	FPK	LLO	LCM
GDX01	GDX02	GDX03	GDX04	GDX05	GDX06	GDX07	GDX08	GDX09	GDX10	GDX11	GDX12	GDX13	GDX14	GDX15	GDX16	GDX17	GDX18	GDX19	GDX20	GDX21	GDX22	GDX23	GDX24	GDX25	GDX26	GDX27	GDX28	GDX29	GCG01	GCG02	GCG03	GCG04	GCG05	GCG06	GCG07	GCG08	GCG09	GCG10	GCG11	GCG12	GCG13	GCG14	GCG15	GCG16	GCG17	GCG18	GCG19	GCG20	GCG21
0
6	0
5	3	0
5	3	0	0
8	4	5	5	0
9	5	4	4	3	0
7	6	3	3	8	7	0
8	5	4	4	7	4	5	0
9	10	9	9	8	9	10	9	0
9	10	8	8	8	6	8	5	8	0
10	6	4	4	6	7	5	8	9	11	0
6	5	5	5	6	7	6	6	4	8	6	0
13	10	8	8	11	9	11	9	12	8	10	10	0
11	12	10	10	14	12	10	11	14	9	15	13	6	0
7	7	8	8	6	7	11	9	8	11	10	7	9	10	0
13	8	12	12	9	10	15	13	12	13	12	9	10	10	5	0
6	4	5	5	4	5	7	8	9	8	5	5	8	10	5	4	0
7	3	5	5	5	7	8	7	8	10	6	5	6	9	5	6	4	0
9	6	5	5	6	7	4	5	7	9	5	4	12	13	9	13	7	7	0
6	3	4	4	5	4	5	2	9	7	7	6	10	13	8	13	6	5	5	0
5	4	5	5	4	5	6	3	6	6	7	3	12	14	6	10	5	6	4	3	0
6	5	4	4	3	4	5	4	5	6	4	3	11	14	6	10	4	6	3	4	1	0
4	6	5	5	4	5	7	6	5	6	6	5	11	10	4	8	4	6	5	6	3	2	0
6	6	5	5	4	6	6	6	6	8	5	4	13	16	7	12	5	7	4	5	2	1	3	0
5	5	4	4	6	8	7	7	8	8	5	6	8	8	7	9	5	3	6	7	6	5	3	6	0
8	5	7	7	6	7	10	8	9	12	9	8	9	9	2	5	5	3	8	6	7	7	5	8	6	0
6	5	4	4	3	4	5	4	5	6	4	3	11	14	6	10	4	6	3	4	1	0	2	1	5	7	0
10	10	13	13	12	12	16	14	14	15	16	9	16	13	9	9	9	10	12	13	12	13	9	13	10	9	13	0
7	10	8	8	9	6	11	7	8	7	13	9	9	6	4	8	8	8	11	9	8	8	4	10	7	5	8	9	0
18	16	15	15	14	16	15	15	16	17	15	14	16	18	18	22	16	15	11	15	13	12	14	12	14	18	12	22	20	0
18	14	17	17	16	18	18	17	21	20	18	16	18	21	20	21	16	15	18	15	15	16	18	14	17	19	16	20	23	13	0
17	17	16	16	18	19	19	20	16	21	18	15	12	12	12	13	14	13	19	20	18	17	15	15	15	12	17	17	14	17	15	0
13	10	11	11	10	13	12	14	15	16	10	11	13	17	15	17	10	10	12	11	11	10	12	9	11	14	10	18	19	9	3	12	0
14	9	10	10	10	12	12	12	15	15	9	11	10	15	15	16	10	8	11	10	11	10	12	9	9	13	10	17	18	7	8	12	4	0
12	14	15	15	12	14	18	18	15	18	16	14	18	16	10	14	11	13	14	15	14	13	9	12	12	10	13	9	12	18	16	15	13	15	0
12	10	10	10	7	9	13	11	12	12	9	10	12	16	10	14	9	9	10	10	8	7	8	6	9	11	7	15	13	7	11	14	8	6	12	0
12	14	16	16	12	16	18	17	10	13	17	13	19	14	10	12	13	12	15	17	12	12	7	11	9	11	12	12	10	19	22	16	19	17	13	11	0
10	6	11	11	8	11	13	12	13	15	11	8	14	15	8	7	6	7	11	10	7	8	8	7	9	8	8	9	13	12	10	11	8	6	11	7	10	0
15	18	19	19	15	17	19	17	18	16	23	19	19	12	12	18	17	17	16	17	14	15	11	14	15	13	15	16	12	12	18	14	16	14	12	11	10	11	0
23	22	24	24	21	24	25	23	16	23	23	17	25	26	22	24	22	22	19	23	18	18	18	16	21	23	18	21	24	15	17	18	16	16	13	16	18	15	18	0
15	17	17	17	13	13	19	16	15	14	21	18	15	13	12	19	16	15	18	14	15	15	12	14	16	12	15	17	11	14	17	13	14	12	12	9	11	13	5	19	0
11	11	12	12	11	14	15	13	16	16	16	13	16	15	10	15	12	11	13	12	10	11	10	10	11	10	11	15	13	12	8	13	8	13	11	7	13	10	11	19	12	0
18	15	18	18	14	18	20	16	18	19	20	16	22	19	11	15	16	14	13	16	13	14	12	12	14	10	14	12	15	20	18	18	19	19	12	13	11	12	11	20	16	9	0
10	11	12	12	14	18	12	16	19	19	16	14	14	9	11	15	12	10	13	14	13	14	12	14	10	10	14	16	15	14	16	12	11	11	14	14	17	10	9	23	14	10	16	0
21	16	18	18	15	20	20	21	15	22	16	16	16	18	14	17	17	13	17	19	17	16	16	16	16	13	16	24	20	15	20	13	14	12	19	10	13	13	15	20	11	14	19	13	0
27	21	21	21	16	20	19	21	20	21	15	21	21	23	21	24	19	20	14	20	18	15	17	14	19	20	15	29	26	9	18	19	13	11	20	9	20	16	14	19	16	17	18	19	13	0
7	5	4	4	5	5	5	5	7	7	4	3	10	13	8	9	4	6	5	6	3	2	4	2	5	9	2	11	9	13	13	14	9	8	14	7	12	6	17	17	17	12	15	15	18	17	0
5	4	3	3	4	5	4	5	6	7	3	2	10	13	7	9	3	5	4	5	2	1	3	2	4	8	1	12	9	13	15	16	9	9	14	8	13	7	18	19	18	12	17	13	17	18	1	0
13	10	14	14	13	19	15	17	18	20	13	13	16	16	13	15	12	10	14	14	12	13	13	13	11	12	13	18	20	13	12	15	8	9	15	10	17	8	14	19	17	9	16	5	10	14	14	12	0
13	12	13	13	9	12	14	15	15	16	13	13	13	14	11	15	10	10	11	12	11	10	10	10	11	11	10	17	15	6	10	14	6	6	10	6	16	8	8	18	9	9	16	8	12	10	12	11	9	0
15	14	14	14	14	15	17	18	19	20	14	15	15	16	13	15	12	14	17	17	15	14	13	13	14	14	14	16	16	11	9	11	8	9	11	5	16	8	13	18	12	7	17	12	12	14	12	13	9	7
11	8	11	11	5	10	14	13	11	14	9	9	13	16	7	9	6	6	9	10	7	6	6	5	7	7	6	12	13	11	12	12	7	6	9	5	10	4	10	15	11	9	10	10	11	11	7	7	8	5
11	7	11	11	9	12	13	12	13	15	10	8	15	17	10	10	8	9	11	11	7	8	9	7	10	11	8	12	15	12	11	13	9	7	14	5	10	2	13	15	14	10	14	12	10	15	6	7	8	10
16	13	14	14	15	18	16	18	19	22	14	15	15	13	12	12	12	12	14	18	15	14	12	13	11	11	14	15	16	12	15	8	11	8	13	11	14	6	10	18	15	12	14	7	12	14	12	13	9	9
13	10	12	12	13	16	13	14	18	18	13	13	15	16	15	18	13	10	12	12	12	13	14	13	11	14	13	19	19	9	13	20	11	10	18	6	18	11	17	23	18	8	19	11	14	15	13	12	7	9
10	11	12	12	10	13	14	12	14	13	15	11	13	13	10	14	10	11	12	11	8	9	9	8	11	11	9	15	13	11	10	9	7	8	12	8	14	7	7	15	9	7	13	7	13	13	10	10	8	7
16	14	13	13	12	13	13	18	17	19	11	14	14	15	14	15	10	13	13	16	15	12	12	12	13	14	12	18	17	8	16	13	9	6	14	9	18	8	13	21	13	17	24	12	14	12	11	11	14	5
10	10	9	9	9	12	10	12	12	13	9	8	12	15	13	16	9	10	10	11	8	7	9	7	9	14	7	18	16	7	10	13	4	4	15	7	16	7	13	16	13	11	21	9	12	13	7	6	8	6
14	14	14	14	10	13	13	12	10	13	15	11	17	18	12	19	14	13	9	11	8	8	10	8	14	13	8	22	15	8	16	19	12	13	17	8	15	13	11	18	12	10	16	15	14	11	12	11	14	8
22	17	21	21	17	21	21	22	18	25	20	16	23	24	18	20	18	17	15	19	17	17	18	17	20	17	17	21	24	15	21	20	16	16	20	16	20	14	19	22	19	18	22	18	14	19	19	18	17	14
7	8	8	8	6	9	10	9	7	10	10	6	10	11	5	10	7	6	8	8	5	5	5	5	7	6	5	13	8	9	13	10	8	8	11	6	9	6	8	16	8	7	12	8	9	14	7	6	9	6
14	13	13	13	13	15	15	15	14	16	15	11	13	15	14	16	13	12	15	15	12	12	13	12	13	15	12	19	16	7	11	12	8	7	17	6	14	8	13	17	11	9	21	12	9	15	11	11	10	8
19	21	20	20	18	19	20	18	22	19	25	21	24	23	20	28	21	22	18	17	16	17	18	16	22	21	17	27	21	21	24	25	21	22	24	17	24	22	17	29	17	17	23	21	25	23	20	20	25	18
9	11	8	8	11	10	10	11	14	13	11	10	10	11	11	15	9	11	12	11	10	9	9	8	10	12	9	14	11	9	11	8	7	5	12	7	16	7	10	17	9	11	19	9	15	16	7	8	12	7
25	20	24	24	16	20	24	22	19	23	23	20	23	24	18	21	20	19	18	20	17	17	18	16	22	18	17	25	23	14	18	19	15	14	20	12	17	13	12	19	12	16	19	19	12	13	19	20	18	11
18	14	18	18	12	16	18	18	15	18	17	14	17	17	12	13	13	13	16	16	13	13	13	11	16	12	13	16	17	15	10	9	8	9	13	10	12	6	9	13	9	11	12	12	10	12	12	14	10	10
12	9	10	10	9	12	11	12	11	13	8	7	14	17	12	11	7	10	9	12	7	6	8	5	9	13	6	15	16	10	12	11	8	6	15	7	12	4	15	14	17	13	16	14	14	11	4	5	11	10
13	10	14	14	9	13	16	15	11	17	13	10	14	16	8	10	9	9	12	12	9	9	9	9	12	8	9	15	14	10	13	10	8	7	11	8	12	4	9	14	9	11	15	9	7	12	11	10	7	5
13	9	13	13	7	12	14	14	10	15	12	9	17	19	9	11	9	8	10	11	8	8	9	7	11	9	8	15	15	17	16	17	12	13	15	9	10	8	16	19	15	11	13	16	12	17	9	9	14	12
11	12	14	14	13	17	17	19	15	19	16	14	16	15	12	15	12	10	17	15	15	15	12	15	11	11	15	16	15	20	18	15	12	15	15	15	14	13	18	25	15	12	22	12	14	26	16	14	13	14
5	6	7	7	8	10	10	10	12	13	11	7	12	11	6	9	6	7	10	9	6	7	6	7	7	7	7	10	9	12	14	11	10	9	11	7	10	4	10	19	11	7	14	6	11	20	7	6	8	8
11	9	12	12	11	18	13	16	17	19	14	12	16	13	11	12	10	9	11	14	11	12	11	12	9	10	12	16	17	16	18	14	13	13	16	13	14	9	14	23	19	10	15	5	12	18	13	11	7	11
17	12	15	15	10	17	16	17	15	20	12	13	18	22	16	19	13	12	11	13	12	11	13	11	13	14	11	21	23	9	13	19	7	8	15	10	20	11	17	14	17	12	18	12	12	10	14	12	6	8
12	9	14	14	12	17	16	17	17	21	14	12	17	18	12	13	10	10	14	13	11	12	12	12	12	11	12	16	19	14	12	13	7	9	14	13	18	6	15	19	17	11	19	7	13	19	13	11	5	9
12	9	12	12	12	15	14	15	19	18	15	14	15	14	12	14	11	9	15	12	13	14	13	14	11	10	14	15	16	13	13	17	11	11	14	8	15	9	15	24	14	6	15	9	13	18	14	13	6	10
25	23	24	24	20	23	23	24	23	27	23	23	28	30	24	31	23	24	18	20	20	19	21	19	25	23	19	31	29	16	24	29	18	20	23	19	31	23	22	24	22	21	28	22	24	18	24	22	20	15
20	16	18	18	16	19	19	20	17	21	14	11	19	23	19	18	14	17	13	19	15	14	16	13	17	20	14	14	24	14	15	15	11	10	16	12	21	10	20	14	21	19	20	18	17	14	12	13	13	14
15	15	15	15	16	17	15	17	14	19	17	9	15	14	14	16	14	14	11	17	14	14	14	13	15	15	14	10	16	10	15	10	12	10	13	12	17	9	12	14	14	15	17	11	15	18	12	13	14	10
8	6	7	7	6	8	8	10	9	12	6	5	12	16	10	12	5	7	7	7	6	5	7	5	8	10	5	12	14	8	12	15	6	5	12	7	15	5	16	14	14	13	19	12	14	15	5	4	10	7
13	8	13	13	10	13	14	13	14	16	12	9	17	20	13	12	9	10	12	11	8	9	11	9	12	13	9	15	18	9	11	18	9	7	16	7	14	3	16	17	17	12	18	15	15	15	8	8	9	9
17	12	17	17	14	17	19	18	19	21	17	14	19	21	16	15	13	14	17	16	13	14	15	13	16	16	14	17	21	11	8	15	8	8	15	7	16	5	15	14	15	9	18	14	13	15	12	13	8	9
15	11	14	14	10	15	16	18	16	19	12	12	16	19	14	14	10	11	14	15	12	11	12	10	12	14	11	17	20	11	8	13	4	6	13	6	15	6	15	15	14	8	18	11	10	12	10	10	6	7
10	11	10	10	12	11	11	13	14	15	13	11	11	10	9	13	10	10	13	12	12	12	11	11	12	10	12	13	10	12	14	10	12	11	13	6	14	9	12	21	10	9	18	11	13	18	10	11	13	9
18	13	17	17	14	16	17	18	16	20	16	13	15	15	13	11	12	12	15	17	14	14	14	15	15	13	14	17	17	13	16	13	12	10	17	13	17	7	14	19	16	17	22	12	13	17	13	13	12	9
8	10	10	10	9	12	12	11	12	11	14	9	16	17	11	16	9	11	10	9	7	8	9	8	11	12	8	16	14	18	20	22	15	17	17	12	16	14	18	24	17	11	17	15	19	24	11	9	16	15
11	13	14	14	11	12	16	13	16	14	18	15	17	18	11	18	11	14	14	9	10	11	11	11	16	11	11	19	14	19	21	21	16	17	15	14	21	15	14	26	12	14	19	15	21	22	16	14	17	12
14	15	14	14	11	12	15	14	15	14	15	15	18	22	15	22	12	16	13	10	11	10	12	10	17	15	10	24	18	16	20	24	14	16	17	12	24	18	19	25	15	15	23	20	22	17	15	13	18	12
17	17	18	18	16	20	20	18	21	19	22	20	23	21	15	21	17	17	17	16	15	16	15	16	17	14	16	24	19	25	26	27	23	25	20	18	19	21	19	32	20	13	14	18	21	25	21	19	19	19
14	14	15	15	13	15	17	15	20	15	20	19	17	16	13	19	13	14	16	11	14	15	14	15	16	11	15	21	16	23	25	22	20	20	18	16	20	19	16	32	13	14	17	15	19	22	20	18	18	16
20	19	18	18	12	16	19	21	18	17	16	19	19	22	17	20	12	18	15	17	16	13	14	13	18	17	13	27	22	19	25	24	16	18	19	14	22	20	20	28	17	18	24	21	18	15	18	16	21	13
8	9	11	11	7	9	14	11	13	14	15	12	18	18	6	14	9	10	11	7	7	8	7	8	12	6	8	14	10	20	22	21	17	18	12	11	14	12	13	26	11	10	13	14	17	23	13	11	16	12
15	15	16	16	12	14	18	16	14	16	18	15	16	19	13	19	13	15	15	12	12	12	13	12	18	13	12	23	17	16	19	17	13	14	16	12	20	15	14	21	9	14	22	15	12	17	17	15	15	10
17	15	19	19	15	19	20	19	19	18	19	16	21	24	18	18	12	17	17	15	13	14	16	14	19	18	14	24	24	20	20	25	16	18	21	16	24	15	23	25	23	17	24	20	23	21	17	15	15	16
9	10	11	11	6	9	13	11	9	12	13	10	15	17	6	14	9	8	10	7	7	7	7	7	11	6	7	16	10	18	20	19	14	16	13	11	14	13	14	24	11	11	14	15	16	20	12	10	16	11
16	18	16	16	13	16	17	16	16	15	17	16	20	23	17	24	15	18	14	14	12	11	13	11	17	18	11	27	20	14	19	25	14	18	19	11	23	20	19	24	18	11	21	20	22	15	16	14	16	13
10	14	14	14	11	12	16	14	11	12	17	14	15	15	10	17	11	13	14	10	11	11	9	11	14	10	11	18	11	17	20	18	15	17	12	12	16	16	13	22	9	12	19	16	18	19	16	14	16	11
14	14	16	16	11	14	18	17	14	17	18	15	17	17	9	14	11	13	14	13	12	12	11	12	16	9	12	19	14	17	21	17	16	18	13	11	16	14	13	23	11	10	16	14	13	17	17	15	14	10
15	14	15	15	9	13	16	16	15	15	15	15	18	20	13	18	11	14	12	12	11	10	11	10	15	13	10	22	18	14	18	22	12	15	15	9	18	15	15	23	13	10	18	16	15	13	15	13	14	9
22	21	22	22	17	20	23	22	17	20	21	19	23	27	21	24	16	22	17	18	17	16	18	16	23	21	16	26	26	18	24	27	18	20	20	17	28	21	23	23	21	20	25	24	24	18	21	19	20	16
21	16	20	20	16	21	22	21	15	23	19	16	18	20	16	17	16	14	16	18	17	17	17	17	17	14	17	19	22	12	16	15	12	12	16	13	19	12	16	17	16	13	17	14	12	13	19	18	10	11
12	14	12	12	13	14	13	15	17	16	14	15	14	16	12	19	11	14	13	12	13	12	12	12	14	13	12	21	16	14	15	18	11	16	14	12	23	17	18	26	17	9	20	14	21	18	15	13	14	10
16	15	15	15	11	14	17	15	16	17	15	16	19	24	16	24	15	14	13	11	12	11	13	11	15	15	11	25	20	12	14	24	10	14	16	10	23	18	19	24	16	10	19	19	20	15	16	14	15	9
14	17	12	12	10	12	12	14	13	11	12	14	18	21	15	23	12	16	11	12	11	8	10	8	14	16	8	26	17	17	25	26	17	19	19	12	21	22	21	28	18	16	21	22	23	16	13	11	21	15
14	13	14	14	9	11	16	14	14	16	14	14	18	20	10	16	11	13	12	11	10	9	9	8	14	10	9	17	14	16	18	17	13	13	12	10	16	11	12	20	11	13	14	16	17	15	12	12	16	10
13	12	13	13	12	15	14	11	14	13	15	13	17	19	14	19	12	14	10	9	8	9	11	9	14	13	9	23	18	16	20	20	15	15	19	14	20	15	16	22	17	14	17	15	18	15	14	12	14	14
15	15	15	15	9	15	17	16	13	15	15	13	19	21	13	18	12	15	11	14	10	9	10	9	14	14	9	21	18	12	20	21	14	16	15	9	16	15	15	17	15	10	15	16	14	13	14	12	13	11
14	11	16	16	13	18	19	18	19	23	17	16	22	21	10	13	12	11	15	14	13	14	12	14	13	8	14	16	17	23	23	22	19	20	15	16	17	12	19	28	22	12	13	14	20	24	17	15	12	16
15	12	13	13	11	11	15	11	13	15	15	14	12	14	10	16	13	11	12	9	11	11	11	12	14	8	11	19	12	12	15	14	11	11	13	10	19	13	11	19	8	10	16	12	12	13	15	14	11	8
11	10	12	12	7	10	13	11	8	11	12	9	14	18	9	14	8	10	9	7	6	6	8	6	13	9	6	19	14	14	17	17	11	12	14	10	16	11	14	18	11	13	17	15	13	14	11	9	13	9
12	12	14	14	9	12	16	14	11	15	15	12	17	19	8	14	10	11	12	10	9	9	9	9	14	8	9	18	13	19	22	17	16	17	14	13	16	13	15	23	13	14	16	16	16	18	14	12	16	12
10	9	10	10	6	10	13	13	12	14	10	10	14	18	10	15	8	8	10	9	8	7	8	7	9	10	7	17	15	12	12	18	7	9	11	6	15	10	15	20	12	8	16	12	12	15	10	8	10	5
13	11	10	10	10	12	11	16	15	17	8	12	15	17	12	13	7	10	11	13	13	10	10	10	10	11	10	17	16	17	22	17	14	13	16	13	18	12	22	28	21	18	22	17	20	18	10	9	18	13
16	15	16	16	11	14	16	16	15	17	15	15	23	26	15	21	13	16	12	12	11	10	12	10	17	15	10	24	20	17	22	27	17	20	18	12	22	18	22	26	21	14	20	23	24	15	15	13	18	14
9	15	13	13	12	13	13	13	9	12	17	11	18	15	10	19	13	14	9	11	10	10	8	10	13	11	10	15	10	17	25	20	20	22	13	14	15	19	14	23	14	13	16	17	22	20	15	13	20	14
14	11	10	10	10	8	9	10	15	12	12	13	14	14	13	16	10	12	9	9	11	10	11	10	13	12	10	17	13	14	17	18	14	15	17	10	19	15	18	26	16	12	19	19	22	16	10	11	21	13
17	17	16	16	13	15	14	16	18	16	17	18	19	20	18	26	16	17	13	12	14	13	15	13	18	17	13	27	21	12	18	22	12	15	19	13	25	20	16	26	14	14	23	16	20	12	18	16	16	10
18	21	21	21	18	16	22	19	16	16	25	20	20	15	16	21	19	20	18	18	19	19	14	20	19	16	19	16	12	21	27	22	24	24	15	17	16	22	14	25	11	18	22	23	23	23	22	22	26	17
14	19	19	19	18	20	20	21	15	17	22	18	22	16	15	18	16	18	18	20	17	17	12	17	15	16	17	19	14	20	27	23	24	25	17	15	11	19	17	26	18	14	21	21	22	24	19	18	21	18
18	24	24	24	20	22	25	25	20	20	28	25	24	19	19	26	21	22	23	21	22	22	17	22	21	19	22	25	18	23	27	27	23	27	18	18	19	26	17	30	14	15	26	22	24	25	27	25	23	17
20	20	19	19	13	17	19	22	19	22	17	20	23	24	16	23	16	18	15	18	17	14	14	14	18	16	14	26	21	15	22	25	15	19	16	12	23	20	18	27	18	13	21	19	21	13	19	17	17	10
23	25	21	21	18	20	21	23	22	22	20	23	23	27	23	32	21	24	19	20	20	17	19	17	23	24	17	34	26	19	26	26	17	19	24	18	31	26	22	30	19	23	32	23	24	17	22	20	24	15
9	7	8	8	5	8	11	10	11	11	8	9	11	14	7	10	5	5	8	7	7	6	6	6	6	6	6	13	11	11	16	14	10	9	12	7	12	8	14	23	13	10	13	13	15	14	8	7	13	8
10	11	10	10	11	12	13	16	17	16	13	13	16	18	13	16	8	12	15	12	13	12	12	12	13	13	12	18	16	22	22	22	16	18	17	12	20	16	25	31	19	13	25	18	20	27	13	11	18	16
18	19	18	18	14	16	19	19	16	19	20	18	21	23	18	26	17	18	14	15	16	15	16	15	19	18	15	23	21	15	24	26	18	19	18	13	25	22	19	26	16	16	23	20	22	18	20	18	21	12
17	15	16	16	12	15	16	17	17	19	16	17	20	21	15	21	14	16	12	13	13	12	13	12	17	14	12	24	20	12	18	19	12	15	16	11	21	16	15	23	14	11	20	15	15	11	17	15	14	9
12	10	13	13	10	12	12	12	14	13	14	11	16	17	13	15	9	12	10	9	8	9	11	9	14	13	9	18	17	10	14	20	11	11	16	9	18	9	14	20	15	12	19	14	18	14	11	10	12	8
12	9	10	10	5	7	13	11	11	13	11	11	16	19	9	15	9	11	9	8	7	6	7	6	12	9	6	17	13	11	17	18	11	10	12	7	14	9	11	19	9	12	15	15	13	12	10	9	14	7
11	11	13	13	10	13	15	12	14	15	15	13	18	20	8	16	11	12	11	9	8	9	9	9	13	9	9	18	14	17	20	20	16	19	15	12	17	14	16	25	17	9	13	16	20	18	14	12	14	14
16	16	14	14	11	14	15	16	13	16	11	15	20	25	14	22	13	16	11	13	12	9	10	9	14	15	9	25	19	17	24	24	16	19	15	13	20	20	23	23	21	16	21	24	22	14	14	12	20	16
14	11	12	12	9	12	11	13	14	14	11	12	17	19	14	18	11	11	10	10	10	9	11	9	12	13	9	20	18	14	17	21	11	12	18	12	18	13	18	24	17	15	19	16	18	16	11	10	15	12
18	18	14	14	12	13	13	15	16	15	13	17	16	20	16	25	15	17	11	13	14	11	13	11	16	17	11	27	19	9	19	21	12	14	19	10	23	20	17	26	15	14	23	20	20	9	15	14	20	10
13	13	10	10	8	10	12	12	11	14	9	12	17	19	9	16	10	12	8	11	9	6	6	5	10	9	6	18	12	15	21	16	14	15	13	10	14	14	15	22	15	12	12	18	18	14	9	9	19	13
12	12	11	11	11	12	12	14	16	14	13	14	14	16	14	18	9	13	12	10	12	11	12	11	14	13	11	21	17	16	19	17	12	14	17	13	22	16	19	27	15	14	24	15	18	18	14	12	17	12
11	12	13	13	11	13	13	13	12	13	16	11	19	21	15	21	12	13	12	9	10	11	13	11	15	15	11	17	18	20	22	26	17	18	19	16	22	17	22	26	19	18	21	19	25	25	14	12	19	17
12	13	14	14	9	11	17	15	13	13	15	15	18	17	9	13	9	13	13	12	11	10	7	10	12	9	10	15	11	19	23	21	18	19	11	10	11	14	14	24	12	11	14	19	18	18	14	13	18	13
14	13	14	14	13	17	15	19	17	19	14	12	17	18	15	17	11	12	13	15	15	14	14	14	13	14	14	14	20	17	19	17	12	14	15	16	21	14	21	24	20	16	20	13	19	21	15	13	13	14
10	9	10	10	7	9	12	12	12	13	10	10	14	16	8	11	6	9	10	9	8	7	7	6	10	8	7	13	12	15	12	13	9	11	9	8	14	8	14	19	13	9	12	14	17	14	8	8	13	8
10	8	9	9	8	10	11	8	12	10	12	9	12	13	10	13	9	9	9	8	6	7	8	8	9	10	7	16	12	10	11	14	8	11	15	7	14	10	13	19	13	4	14	11	13	14	9	8	9	10
12	12	11	11	7	7	11	10	13	10	13	13	13	13	9	16	10	11	10	8	9	8	8	9	12	9	8	17	10	14	19	19	13	13	13	10	17	14	10	24	8	13	16	13	17	15	12	11	16	8
23	20	23	23	17	22	20	25	23	21	21	21	24	21	19	17	14	19	17	22	19	18	18	18	20	19	18	25	25	21	28	28	23	23	23	19	21	18	21	31	26	22	22	21	25	19	20	19	22	16
13	13	15	15	10	13	17	15	11	17	16	11	18	20	9	16	12	12	11	11	10	10	10	10	15	9	10	15	14	14	15	18	12	16	9	10	17	13	14	18	12	8	12	15	15	16	15	13	12	8
20	20	21	21	18	19	21	19	24	17	25	23	20	19	19	23	17	20	20	16	18	19	19	18	22	18	19	25	21	21	22	24	20	21	21	17	25	21	17	30	16	16	20	20	26	21	22	22	21	17
15	14	15	15	10	13	14	15	14	17	14	14	21	23	14	21	13	15	10	11	10	9	11	9	16	14	9	23	19	12	17	24	12	15	15	10	21	15	16	21	16	12	19	17	19	12	14	12	14	8
18	18	20	20	15	17	19	18	14	16	20	17	21	21	17	21	16	18	15	15	14	14	14	13	19	17	14	23	19	15	18	22	16	18	17	12	18	17	16	19	15	14	20	22	21	14	17	17	18	13
16	14	15	15	12	14	15	16	16	16	14	14	18	21	16	18	11	15	13	13	12	11	13	10	16	16	11	21	20	13	14	20	11	13	16	9	21	13	19	20	18	12	20	19	21	13	12	12	14	11
18	15	18	18	13	16	17	14	15	17	18	14	21	21	15	19	16	17	11	14	9	10	12	11	17	16	10	23	19	10	16	21	13	14	18	11	19	12	11	16	16	12	17	14	16	11	14	13	11	9
19	18	19	19	13	19	18	19	16	20	17	16	25	26	17	23	17	18	12	17	12	11	13	11	17	18	11	27	23	12	19	26	14	18	19	11	20	17	17	21	21	11	18	18	19	11	16	14	13	11
20	16	21	21	13	18	22	18	18	20	20	17	25	28	17	21	17	16	15	15	12	13	15	13	18	17	13	24	23	19	23	29	19	18	22	15	20	15	19	25	21	19	19	22	22	20	17	16	19	15
17	14	17	17	11	16	19	18	12	17	15	14	18	22	10	13	11	12	13	14	12	11	11	11	15	9	11	21	17	19	23	19	17	20	16	14	16	15	20	24	19	13	15	20	16	17	16	14	16	15
15	15	13	13	11	13	12	17	15	18	11	14	21	24	16	22	12	15	11	13	13	10	12	10	15	16	10	24	20	16	22	27	15	18	18	12	24	19	25	28	23	16	25	22	25	17	13	11	19	13
22	24	19	19	19	20	19	21	21	21	18	22	22	27	21	31	20	24	17	19	19	16	18	16	22	23	16	34	25	19	28	28	20	23	25	18	31	28	26	32	24	21	30	26	27	19	21	19	25	19
19	20	22	22	18	21	22	21	22	22	24	21	24	23	17	23	18	21	18	18	16	17	17	17	22	18	17	26	22	18	22	25	19	22	19	16	25	19	16	26	19	14	21	17	23	19	22	20	16	13
14	19	19	19	16	17	22	20	17	18	23	20	19	17	12	19	15	17	20	16	17	17	13	17	18	12	17	20	13	21	24	20	20	23	13	15	19	20	15	27	12	12	20	18	22	23	22	20	18	14
12	12	15	15	10	13	15	14	14	15	17	12	19	18	10	15	10	13	9	10	9	10	10	10	15	10	10	14	15	17	22	22	17	18	13	14	18	13	13	23	15	14	14	14	20	19	15	13	16	11
8	7	9	9	7	8	9	8	10	11	10	6	14	13	6	10	7	8	5	7	5	6	6	7	9	7	6	8	9	14	15	19	13	15	10	9	14	9	13	20	16	9	10	12	18	18	8	7	12	9
20	18	20	20	15	16	20	18	16	18	21	16	18	18	14	17	15	17	14	16	15	15	15	16	20	14	15	19	17	15	20	20	17	19	15	14	22	17	15	21	15	14	18	18	19	16	19	18	17	11
18	20	21	21	17	21	22	22	17	24	23	17	24	21	12	19	18	18	15	20	16	16	14	16	19	13	16	19	17	19	27	20	22	24	15	17	19	18	14	24	18	14	15	15	19	21	21	19	17	14
26	28	32	32	26	28	35	30	25	29	34	28	36	31	23	27	27	28	27	28	26	27	21	27	26	23	27	19	23	33	35	36	34	35	20	27	21	26	24	29	26	25	21	33	36	36	30	30	32	28
14	13	14	14	9	12	15	14	13	16	13	13	21	25	13	20	12	14	11	10	9	8	10	8	15	13	8	22	18	15	16	25	12	16	14	10	20	15	19	22	17	11	17	20	20	15	13	11	15	10
13	15	16	16	12	15	17	17	14	17	17	15	17	15	7	13	11	13	13	14	12	12	10	12	15	8	12	18	12	18	24	17	19	21	13	12	16	15	12	25	14	11	14	13	16	17	17	15	14	11
17	16	18	18	12	17	20	19	16	19	16	16	22	24	12	16	12	16	14	16	12	11	11	11	16	13	11	22	19	17	22	23	17	20	15	11	18	15	18	23	20	11	15	19	19	14	16	14	13	13
13	12	14	14	8	12	14	15	13	16	13	13	18	18	9	14	9	12	9	11	9	8	8	8	13	9	8	18	15	14	20	17	13	14	12	11	16	11	11	21	13	13	15	12	15	11	13	11	13	7
18	16	20	20	13	18	22	20	15	20	19	16	22	24	12	15	13	15	16	16	13	13	13	13	18	12	13	22	19	19	22	22	18	21	16	13	18	15	19	23	19	12	16	20	18	17	18	16	14	14
16	14	18	18	11	16	18	18	13	18	17	14	20	20	10	13	11	13	12	14	11	11	11	11	16	10	11	20	17	17	22	20	17	19	15	13	16	13	15	22	17	13	15	16	16	15	16	14	14	11
[truncated: 115 more columns]

## Sheet: PopGD
1	6
Mean Pop Codom Genotypic Genetic Distance	Sheet1	Pairwise Population Matrix of Mean Pop Codom Genotypic Genetic Distance
GDX	GCG	FMM	FPK	LLO	LCM
7.18473	13.6101	13.8086	14.3594	14.2092	16.25	GDX
13.6101	12.3138	12.5729	16.568	16.7115	17.4327	GCG
13.8086	12.5729	12.0936	16.0531	16.308	17.0374	FMM
14.3594	16.568	16.0531	10.9446	13.1744	12.6218	FPK
14.2092	16.7115	16.308	13.1744	13.2092	14.1333	LLO
16.25	17.4327	17.0374	12.6218	14.1333	12.0145	LCM

## Sheet: PCoA
Principal Coordinates Analysis (PCoA)
PCoA via Distance matrix with data standardization
Data Sheet	PopGD
Data Title	Mean Pop Codom Genotypic Genetic Distance
No. Samples	6
Percentage of variation explained by the first 3 axes
Axis	1	2	3
%	63.0504	25.3801	5.17372
Cum %	63.0504	88.4305	93.6042
Eigen Values by Axis and Sample Eigen Vectors
Axis No.	1	2	3	4	5
EigenValue	30.6691	12.3454	2.51661	2.3724	0.73867
GDX	1.56777	-2.91297	-0.45798	0.122384	0.104065
GCG	2.6935	1.03566	-0.152218	0.138777	-0.590383
FMM	2.38579	1.23976	0.250689	-0.294877	0.57847
FPK	-2.25637	-0.172662	-0.118389	-1.24427	-0.14082
LLO	-1.57441	-0.617223	1.24928	0.455825	-0.0735378
LCM	-2.77385	0.916352	-0.80382	0.703723	0.139366

## Sheet: Fst
Results of Analysis of Molecular Variance
Input as Allelic Distance Matrix for F-Statistics Analysis
Data Sheet	Sheet1
Data Title
No. Samples	164
No. Pops	6
No. Regions	1
No. Permutations	999	No. PW Pop Permutations	999
N0	54.6
SSTOT	1120.54
Pop	GDX	GCG	FMM	FPK	LLO	LCM
n	58	52	58	52	60	48
SSWP	132.793	152.462	171.655	150.904	217.267	155.583
Summary AMOVA Table
Source	df	SS	MS	Est. Var.	%
Among Pops	5	139.876	27.9752	0.460764	0.123662
Among Indiv	158	445.164	2.81749	0	0
Within Indiv	164	535.5	3.26524	3.26524	0.876338
Total	327	1120.54		3.72601	1
F-Statistics	Value	P(rand >= data)
Fst	0.131567	0.001
Fis	-0.0736104	1
Fit	0.067641	0.001
Fst max	0.64219
F'st	0.204872
Nm	1.65018
Probability, P(rand >= data), for Fst, Fis and Fit is based on standard permutation across the full data set.
Fst = AP / (WI + AI + AP) = AP / TOT
Fis = AI / (WI + AI)
Fit = (AI + AP) / (WI + AI + AP) = (AI + AP) / TOT
Nm = [(1 / Fst) - 1] / 4
Key: AP = Est. Var. Among Pops, AI = Est. Var. Among Individuals, WI = Est. Var. Within Individuals
Warning! Negative Among Individuals. Est. Var. of -0.224 converted to zero for pie chart presentation!

## Sheet: AFP
Allele Frequencies by Population for Codominant Data
Data Sheet	Sheet1
Data Title
No. Loci	17
No. Samples	164
No. Pops.	6
Allele Frequencies and Sample Size by Populations
Locus	Allele/n	GDX	GCG	FMM	FPK	LLO	LCM
N3	N	29	26	29	26	30	24
	261	0.03448	0	0	0	0	0.02083
	267	0.24138	0.25	0.17241	0.23077	0.46667	0.20833
	273	0.55172	0.61538	0.62069	0.61538	0.46667	0.58333
	279	0.17241	0.13462	0.2069	0.15385	0.06667	0.1875
N6	N	29	26	29	26	30	24
	212	0	0.15385	0	0.05769	0.03333	0.0625
	216	1	0.67308	0.81034	0.65385	0.6	0.29167
	220	0	0.01923	0.01724	0	0.01667	0.04167
	224	0	0.15385	0.17241	0.28846	0.35	0.54167
	228	0	0	0	0	0	0.0625
N9	N	29	26	29	26	30	24
	127	0	0	0	0.03846	0	0
	145	0.67241	0.32692	0.31034	0.48077	0.68333	0.35417
	151	0.32759	0.67308	0.68966	0.23077	0.31667	0.5625
	157	0	0	0	0	0	0.02083
	163	0	0	0	0.07692	0	0.02083
	169	0	0	0	0	0	0.02083
	175	0	0	0	0.03846	0	0.02083
	187	0	0	0	0.13462	0	0
N10	N	29	26	29	26	30	24
	194	1	1	0.94828	0.65385	0.71667	0.60417
	224	0	0	0.05172	0.34615	0.28333	0.39583
Z13	N	29	26	29	26	30	24
	117	0.01724	0.13462	0.03448	0	0	0.04167
	120	0	0	0	0	0.01667	0.0625
	123	0.2931	0.21154	0.18966	0.11538	0.06667	0.0625
	126	0.03448	0	0	0.01923	0.05	0.02083
	132	0.65517	0.65385	0.77586	0.86538	0.86667	0.8125
N22	N	29	26	29	26	30	24
	165	0.31034	0.38462	0.24138	0.26923	0.23333	0.39583
	170	0.60345	0.44231	0.55172	0.55769	0.55	0.60417
	175	0	0.17308	0.2069	0.17308	0.2	0
	180	0.08621	0	0	0	0.01667	0
N24	N	29	26	29	26	30	24
	268	0	0	0	0	0.03333	0.02083
	272	0	0	0.01724	0	0.13333	0.04167
	276	1	1	0.87931	1	0.81667	0.91667
	280	0	0	0.10345	0	0.01667	0.02083
Z31	N	29	26	29	26	30	24
	228	0	0.28846	0.36207	0.01923	0.11667	0
	231	0.03448	0.44231	0.22414	0.01923	0.05	0.0625
	234	0	0	0.01724	0	0.05	0.0625
	237	0.37931	0.23077	0.37931	0.94231	0.71667	0.8125
	240	0.58621	0.03846	0.01724	0.01923	0.06667	0.0625
Z32	N	29	26	29	26	30	24
	114	0.13793	0.07692	0.01724	0.01923	0.13333	0.08333
	118	0	0.07692	0	0	0.01667	0
	122	0.86207	0.84615	0.98276	0.98077	0.85	0.91667
Z33	N	29	26	29	26	30	24
	255	0	0.05769	0.05172	0.01923	0	0
	261	0.06897	0.03846	0.08621	0	0.05	0.125
	264	0.91379	0.90385	0.86207	0.88462	0.86667	0.85417
	267	0.01724	0	0	0.07692	0.06667	0.02083
	270	0	0	0	0.01923	0.01667	0
Z36	N	29	26	29	26	30	24
	211	0.08621	0	0	0.40385	0.13333	0.29167
	215	0	0.03846	0.08621	0.07692	0.3	0.02083
	219	0.91379	0.96154	0.91379	0.51923	0.56667	0.6875
Z38	N	29	26	29	26	30	24
	109	0	0	0.01724	0	0.01667	0.02083
	112	0.77586	0.75	0.87931	0.84615	0.78333	0.9375
	115	0	0.09615	0.05172	0.03846	0.2	0.04167
	118	0.22414	0.15385	0.05172	0.11538	0	0
N41	N	29	26	29	26	30	24
	197	0	0	0	0	0.01667	0
	205	0	0	0	0	0	0.04167
	209	0	0	0.03448	0	0.01667	0.04167
	213	1	1	0.93103	0.96154	0.83333	0.89583
	217	0	0	0.01724	0.03846	0.13333	0.02083
	221	0	0	0.01724	0	0	0
Z48	N	29	26	29	26	30	24
	215	0	0	0	0	0.01667	0.02083
	217	0	0	0.03448	0	0.01667	0.02083
	219	0	0.01923	0.03448	0	0.05	0.04167
	221	0.94828	0.86538	0.72414	0.92308	0.66667	0.64583
	223	0	0	0.12069	0.07692	0.03333	0
	225	0.05172	0.11538	0.08621	0	0.21667	0.27083
Z50	N	29	26	29	26	30	24
	144	0.01724	0	0.03448	0.01923	0	0
	146	0.05172	0.15385	0.03448	0.05769	0.1	0.02083
	148	0.53448	0.61538	0.48276	0.51923	0.55	0.52083
	152	0.39655	0.17308	0.25862	0.28846	0.26667	0.4375
	154	0	0.05769	0.18966	0.11538	0.08333	0.02083
Z54	N	29	26	29	26	30	24
	212	0.74138	0.67308	0.74138	0.09615	0.28333	0.0625
	216	0.25862	0.32692	0.25862	0.90385	0.71667	0.9375
X70	N	29	26	29	26	30	24
	244	0	0	0.05172	0.13462	0.06667	0.3125
	247	0.96552	0.28846	0.2069	0.5	0.66667	0.45833
	250	0.03448	0.71154	0.74138	0.36538	0.26667	0.22917

## Sheet: AFL
Allele Frequencies by Locus for Codominant Data
Data Sheet	Sheet1
Data Title
No. Loci	17
No. Samples	164
No. Pops.	6
Allele Frequencies and Sample Size by Locus
Pop	Allele/n	N3	N6	N9	N10	Z13	N22	N24	Z31	Z32	Z33	Z36	Z38	N41	Z48	Z50	Z54	X70
GDX	N	29	29	29	29	29	29	29	29	29	29	29	29	29	29	29	29	29
	109												0
	112												0.77586
	114									0.13793
	115												0
	117					0.01724
	118									0			0.22414
	120					0
	122									0.86207
	123					0.2931
	126					0.03448
	127			0
	132					0.65517
	144															0.01724
	145			0.67241
	146															0.05172
	148															0.53448
	151			0.32759
	152															0.39655
	154															0
	157			0
	163			0
	165						0.31034
	169			0
	170						0.60345
	175			0			0
	180						0.08621
	187			0
	194				1
	197													0
	205													0
	209													0
	211											0.08621
	212		0														0.74138
	213													1
	215											0			0
	216		1														0.25862
	217													0	0
	219											0.91379			0
	220		0
	221													0	0.94828
	223														0
	224		0		0
	225														0.05172
	228		0						0
	231								0.03448
	234								0
	237								0.37931
	240								0.58621
	244																	0
	247																	0.96552
	250																	0.03448
	255										0
	261	0.03448									0.06897
	264										0.91379
	267	0.24138									0.01724
	268							0
	270										0
	272							0
	273	0.55172
	276							1
	279	0.17241
	280							0
GCG	N	26	26	26	26	26	26	26	26	26	26	26	26	26	26	26	26	26
	109												0
	112												0.75
	114									0.07692
	115												0.09615
	117					0.13462
	118									0.07692			0.15385
	120					0
	122									0.84615
	123					0.21154
	126					0
	127			0
	132					0.65385
	144															0
	145			0.32692
	146															0.15385
	148															0.61538
	151			0.67308
	152															0.17308
	154															0.05769
	157			0
	163			0
	165						0.38462
	169			0
	170						0.44231
	175			0			0.17308
	180						0
	187			0
	194				1
	197													0
	205													0
	209													0
	211											0
	212		0.15385														0.67308
	213													1
	215											0.03846			0
	216		0.67308														0.32692
	217													0	0
	219											0.96154			0.01923
	220		0.01923
	221													0	0.86538
	223														0
	224		0.15385		0
	225														0.11538
	228		0						0.28846
	231								0.44231
	234								0
	237								0.23077
	240								0.03846
	244																	0
	247																	0.28846
	250																	0.71154
	255										0.05769
	261	0									0.03846
	264										0.90385
	267	0.25									0
	268							0
	270										0
	272							0
	273	0.61538
	276							1
	279	0.13462
	280							0
FMM	N	29	29	29	29	29	29	29	29	29	29	29	29	29	29	29	29	29
	109												0.01724
	112												0.87931
	114									0.01724
	115												0.05172
	117					0.03448
	118									0			0.05172
	120					0
	122									0.98276
	123					0.18966
	126					0
	127			0
	132					0.77586
	144															0.03448
	145			0.31034
	146															0.03448
	148															0.48276
	151			0.68966
	152															0.25862
	154															0.18966
	157			0
	163			0
	165						0.24138
	169			0
	170						0.55172
	175			0			0.2069
	180						0
	187			0
	194				0.94828
	197													0
	205													0
	209													0.03448
	211											0
	212		0														0.74138
	213													0.93103
	215											0.08621			0
	216		0.81034														0.25862
	217													0.01724	0.03448
	219											0.91379			0.03448
	220		0.01724
	221													0.01724	0.72414
	223														0.12069
	224		0.17241		0.05172
	225														0.08621
	228		0						0.36207
	231								0.22414
	234								0.01724
	237								0.37931
	240								0.01724
	244																	0.05172
	247																	0.2069
	250																	0.74138
	255										0.05172
	261	0									0.08621
	264										0.86207
	267	0.17241									0
	268							0
	270										0
	272							0.01724
	273	0.62069
	276							0.87931
	279	0.2069
	280							0.10345
FPK	N	26	26	26	26	26	26	26	26	26	26	26	26	26	26	26	26	26
	109												0
	112												0.84615
	114									0.01923
	115												0.03846
	117					0
	118									0			0.11538
	120					0
	122									0.98077
	123					0.11538
	126					0.01923
	127			0.03846
	132					0.86538
	144															0.01923
	145			0.48077
	146															0.05769
	148															0.51923
	151			0.23077
	152															0.28846
	154															0.11538
	157			0
	163			0.07692
	165						0.26923
	169			0
	170						0.55769
	175			0.03846			0.17308
	180						0
	187			0.13462
	194				0.65385
	197													0
	205													0
	209													0
	211											0.40385
	212		0.05769														0.09615
	213													0.96154
	215											0.07692			0
	216		0.65385														0.90385
	217													0.03846	0
	219											0.51923			0
	220		0
	221													0	0.92308
	223														0.07692
	224		0.28846		0.34615
	225														0
	228		0						0.01923
	231								0.01923
	234								0
	237								0.94231
	240								0.01923
	244																	0.13462
	247																	0.5
	250																	0.36538
	255										0.01923
	261	0									0
	264										0.88462
	267	0.23077									0.07692
	268							0
	270										0.01923
	272							0
	273	0.61538
	276							1
	279	0.15385
	280							0
LLO	N	30	30	30	30	30	30	30	30	30	30	30	30	30	30	30	30	30
	109												0.01667
	112												0.78333
	114									0.13333
	115												0.2
	117					0
	118									0.01667			0
	120					0.01667
	122									0.85
	123					0.06667
	126					0.05
	127			0
	132					0.86667
	144															0
	145			0.68333
	146															0.1
	148															0.55
	151			0.31667
	152															0.26667
	154															0.08333
	157			0
	163			0
	165						0.23333
	169			0
	170						0.55
	175			0			0.2
	180						0.01667
	187			0
	194				0.71667
	197													0.01667
	205													0
	209													0.01667
	211											0.13333
	212		0.03333														0.28333
	213													0.83333
	215											0.3			0.01667
	216		0.6														0.71667
	217													0.13333	0.01667
	219											0.56667			0.05
	220		0.01667
	221													0	0.66667
	223														0.03333
	224		0.35		0.28333
	225														0.21667
	228		0						0.11667
	231								0.05
	234								0.05
	237								0.71667
	240								0.06667
	244																	0.06667
	247																	0.66667
	250																	0.26667
	255										0
	261	0									0.05
	264										0.86667
	267	0.46667									0.06667
	268							0.03333
	270										0.01667
	272							0.13333
	273	0.46667
	276							0.81667
	279	0.06667
	280							0.01667
LCM	N	24	24	24	24	24	24	24	24	24	24	24	24	24	24	24	24	24
	109												0.02083
	112												0.9375
	114									0.08333
	115												0.04167
	117					0.04167
	118									0			0
	120					0.0625
	122									0.91667
	123					0.0625
	126					0.02083
	127			0
	132					0.8125
	144															0
	145			0.35417
	146															0.02083
	148															0.52083
	151			0.5625
	152															0.4375
	154															0.02083
	157			0.02083
	163			0.02083
	165						0.39583
	169			0.02083
	170						0.60417
	175			0.02083			0
	180						0
	187			0
	194				0.60417
	197													0
	205													0.04167
	209													0.04167
	211											0.29167
	212		0.0625														0.0625
	213													0.89583
	215											0.02083			0.02083
	216		0.29167														0.9375
	217													0.02083	0.02083
	219											0.6875			0.04167
	220		0.04167
	221													0	0.64583
	223														0
	224		0.54167		0.39583
	225														0.27083
	228		0.0625						0
	231								0.0625
	234								0.0625
	237								0.8125
	240								0.0625
	244																	0.3125
	247																	0.45833
	250																	0.22917
	255										0
	261	0.02083									0.125
	264										0.85417
	267	0.20833									0.02083
	268							0.02083
	270										0
	272							0.04167
	273	0.58333
	276							0.91667
	279	0.1875
	280							0.02083

## Sheet: HFP
Heterozygosity, Fstatistics and Polymorphism by Population for Codominant Data
Data Sheet	Sheet1
Data Title
No. Loci	17
No. Samples	164
No. Pops.	6
Sample Size, No. Alleles, No. Effective Alleles, Information Index, Observed Heterozygosity, Expected and Unbiased Expected Heterozygosity, and Fixation Index
Pop	Locus	N	Na	Ne	I	Ho	He	uHe	F
GDX	N3	29	4	2.54079	1.0904	0.724138	0.606421	0.61706	-0.194118
	N6	29	1	1	0	0	0	0	#N/A
	N9	29	2	1.78746	0.632456	0.586207	0.440547	0.448276	-0.330634
	N10	29	1	1	0	0	0	0	#N/A
	Z13	29	4	1.93556	0.822871	0.689655	0.483353	0.491833	-0.426814
	N22	29	3	2.13723	0.879218	0.37931	0.532105	0.54144	0.287151
	N24	29	1	1	0	0	0	0	#N/A
	Z31	29	3	2.04623	0.7969	0.724138	0.511296	0.520266	-0.416279
	Z32	29	2	1.31201	0.40119	0.275862	0.237812	0.241984	-0.16
	Z33	29	3	1.19038	0.336811	0.103448	0.159929	0.162734	0.35316
	Z36	29	2	1.18701	0.293673	0.172414	0.157551	0.160315	-0.0943396
	Z38	29	2	1.53327	0.532096	0.448276	0.3478	0.353902	-0.288889
	N41	29	1	1	0	0	0	0	#N/A
	Z48	29	2	1.10877	0.203561	0.103448	0.0980975	0.0998185	-0.0545455
	Z50	29	4	2.24267	0.924826	0.896552	0.554102	0.563823	-0.618026
	Z54	29	2	1.62199	0.571609	0.517241	0.383472	0.3902	-0.348837
	X70	29	2	1.07134	0.149995	0.0689655	0.0665874	0.0677556	-0.0357143
GCG	N3	26	3	2.17713	0.915296	0.538462	0.54068	0.551282	0.00410397
	N6	26	4	1.99705	0.918393	0.423077	0.49926	0.50905	0.152593
	N9	26	2	1.786	0.631978	0.576923	0.440089	0.448718	-0.310924
	N10	26	1	1	0	0	0	0	#N/A
	Z13	26	3	2.03922	0.87635	0.692308	0.509615	0.519608	-0.358491
	N22	26	3	2.67723	1.0319	0.423077	0.626479	0.638763	0.324675
	N24	26	1	1	0	0	0	0	#N/A
	Z31	26	4	2.99778	1.18312	0.730769	0.66642	0.679487	-0.0965594
	Z32	26	3	1.37398	0.535961	0.0769231	0.272189	0.277526	0.717391
	Z33	26	3	1.21692	0.381262	0.115385	0.178254	0.18175	0.352697
	Z36	26	2	1.07987	0.163024	0.0769231	0.0739645	0.0754148	-0.04
	Z38	26	3	1.6795	0.728905	0.5	0.404586	0.412519	-0.235832
	N41	26	1	1	0	0	0	0	#N/A
	Z48	26	3	1.31135	0.450275	0.269231	0.237426	0.242081	-0.133956
	Z50	26	4	2.29542	1.0549	0.769231	0.564349	0.575415	-0.363041
	Z54	26	2	1.786	0.631978	0.346154	0.440089	0.448718	0.213445
	X70	26	2	1.69636	0.600768	0.269231	0.410503	0.418552	0.344144
FMM	N3	29	3	2.18442	0.925074	0.689655	0.542212	0.551724	-0.27193
	N6	29	3	1.45628	0.543498	0.275862	0.313317	0.318814	0.119545
	N9	29	2	1.74844	0.619376	0.413793	0.428062	0.435572	0.0333333
	N10	29	2	1.10877	0.203561	0.103448	0.0980975	0.0998185	-0.0545455
	Z13	29	3	1.56465	0.628323	0.448276	0.36088	0.367211	-0.242175
	N22	29	3	2.46628	0.99718	0.724138	0.59453	0.604961	-0.218
	N24	29	3	1.27521	0.417794	0.172414	0.215815	0.219601	0.201102
	Z31	29	5	3.06934	1.21075	0.689655	0.674197	0.686025	-0.0229277
	Z32	29	2	1.03508	0.0870995	0.0344828	0.0338882	0.0344828	-0.0175439
	Z33	29	3	1.32755	0.49244	0.137931	0.24673	0.251059	0.440964
	Z36	29	2	1.18701	0.293673	0.172414	0.157551	0.160315	-0.0943396
	Z38	29	4	1.28397	0.489499	0.241379	0.221165	0.225045	-0.0913978
	N41	29	4	1.15127	0.32266	0.0689655	0.131391	0.133696	0.475113
	Z48	29	5	1.82232	0.932456	0.206897	0.451249	0.459165	0.541502
	Z50	29	5	2.95606	1.24886	1	0.661712	0.673321	-0.511231
	Z54	29	2	1.62199	0.571609	0.241379	0.383472	0.3902	0.370543
	X70	29	3	1.68032	0.701024	0.37931	0.404875	0.411978	0.0631424
FPK	N3	26	3	2.19481	0.925129	0.615385	0.544379	0.555053	-0.130435
	N6	26	3	1.94532	0.800997	0.538462	0.485947	0.495475	-0.108067
	N9	26	6	3.2114	1.40836	0.653846	0.688609	0.702112	0.0504834
	N10	26	2	1.82703	0.645033	0.538462	0.452663	0.461538	-0.189542
	Z13	26	3	1.31135	0.450275	0.269231	0.237426	0.242081	-0.133956
	N22	26	3	2.4186	0.982524	0.653846	0.586538	0.598039	-0.114754
	N24	26	1	1	0	0	0	0	#N/A
	Z31	26	4	1.12479	0.283952	0.115385	0.110947	0.113122	-0.04
	Z32	26	2	1.0392	0.0950301	0.0384615	0.0377219	0.0384615	-0.0196078
	Z33	26	4	1.2671	0.457731	0.0769231	0.210799	0.214932	0.635088
	Z36	26	3	2.27993	0.903787	0.653846	0.561391	0.572398	-0.16469
	Z38	26	3	1.36842	0.515836	0.307692	0.269231	0.27451	-0.142857
	N41	26	2	1.07987	0.163024	0	0.0739645	0.0754148	1
	Z48	26	2	1.16552	0.271189	0.153846	0.142012	0.144796	-0.0833333
	Z50	26	5	2.704	1.18865	0.961538	0.630178	0.642534	-0.525822
	Z54	26	2	1.21038	0.316549	0.192308	0.173817	0.177225	-0.106383
	X70	26	3	2.48987	0.984393	0.576923	0.598373	0.610106	0.0358467
LLO	N3	30	3	2.27273	0.891867	0.666667	0.56	0.569492	-0.190476
	N6	30	4	2.06659	0.855545	0.533333	0.516111	0.524859	-0.0333692
	N9	30	2	1.76298	0.624331	0.566667	0.432778	0.440113	-0.309371
	N10	30	2	1.68382	0.596074	0.566667	0.406111	0.412994	-0.395349
	Z13	30	4	1.31868	0.522583	0.266667	0.241667	0.245763	-0.103448
	N22	30	4	2.51748	1.0585	0.7	0.602778	0.612994	-0.16129
	N24	30	4	1.45749	0.615661	0.2	0.313889	0.319209	0.362832
	Z31	30	5	1.86335	0.969514	0.5	0.463333	0.471186	-0.0791367
	Z32	30	3	1.35034	0.475034	0.1	0.259444	0.263842	0.614561
	Z33	30	4	1.31868	0.522583	0.1	0.241667	0.245763	0.586207
	Z36	30	3	2.33161	0.951703	0.766667	0.571111	0.580791	-0.342412
	Z38	30	3	1.52931	0.581414	0.433333	0.346111	0.351977	-0.252006
	N41	30	4	1.40296	0.557067	0.333333	0.287222	0.29209	-0.160542
	Z48	30	6	2.01794	1.00132	0.566667	0.504444	0.512994	-0.123348
	Z50	30	4	2.56046	1.11861	0.9	0.609444	0.619774	-0.476755
	Z54	30	2	1.68382	0.596074	0.366667	0.406111	0.412994	0.0971272
	X70	30	3	1.92308	0.803315	0.533333	0.48	0.488136	-0.111111
LCM	N3	24	4	2.38509	1.03573	0.625	0.580729	0.593085	-0.0762332
	N6	24	5	2.57718	1.17047	0.541667	0.611979	0.625	0.114894
	N9	24	6	2.2544	1.01386	0.583333	0.556424	0.568262	-0.0483619
	N10	24	2	1.91681	0.671286	0.625	0.478299	0.488475	-0.306715
	Z13	24	5	1.49223	0.72835	0.333333	0.329861	0.336879	-0.0105263
	N22	24	2	1.91681	0.671286	0.458333	0.478299	0.488475	0.0417423
	N24	24	4	1.18641	0.373479	0.166667	0.157118	0.160461	-0.0607735
	Z31	24	4	1.48837	0.688567	0.291667	0.328125	0.335106	0.111111
	Z32	24	2	1.18033	0.286836	0.0833333	0.152778	0.156028	0.454545
	Z33	24	3	1.34109	0.475222	0.25	0.25434	0.259752	0.0170648
	Z36	24	3	1.7916	0.697627	0.541667	0.44184	0.451241	-0.225933
	Z38	24	3	1.13498	0.273574	0.125	0.118924	0.121454	-0.0510949
	N41	24	4	1.24004	0.44403	0.125	0.193576	0.197695	0.35426
	Z48	24	5	2.02817	0.929863	0.708333	0.506944	0.51773	-0.39726
	Z50	24	4	2.1573	0.862725	0.958333	0.536458	0.547872	-0.786408
	Z54	24	2	1.13274	0.233792	0.125	0.117188	0.119681	-0.0666667
	X70	24	3	2.7759	1.05869	0.666667	0.639757	0.653369	-0.0420624
Mean and SE over Loci for each Pop
Pop		N	Na	Ne	I	Ho	He	uHe	F
GDX	Mean	29	2.29412	1.51263	0.449153	0.334686	0.269357	0.274083	-0.179068
	SE	0	0.253863	0.124127	0.0885825	0.0745557	0.0543229	0.055276	0.0671053
GCG	Mean	26	2.58824	1.71258	0.594359	0.341629	0.344936	0.351699	0.0407319
	SE	0	0.243426	0.145805	0.0934252	0.0647865	0.0549391	0.0560163	0.0781575
FMM	Mean	29	3.17647	1.70229	0.628522	0.352941	0.348185	0.354293	0.0424208
	SE	0	0.260589	0.151272	0.0817434	0.066548	0.0475259	0.0483597	0.0702539
FPK	Mean	26	3	1.74339	0.611321	0.373303	0.341411	0.348106	-0.00237689
	SE	0	0.297044	0.167968	0.0991938	0.0711771	0.0571139	0.0582338	0.0851084
LLO	Mean	30	3.52941	1.82714	0.749482	0.476471	0.426013	0.433234	-0.0634052
	SE	0	0.258924	0.100851	0.0522684	0.0548888	0.0307531	0.0312743	0.0764042
LCM	Mean	24	3.58824	1.76467	0.683258	0.42402	0.381332	0.389445	-0.057554
	SE	0	0.297771	0.130821	0.0725309	0.062626	0.0449961	0.0459535	0.0676695
Grand Mean and SE over Loci and Pops
		N	Na	Ne	I	Ho	He	uHe	F
Total	Mean	27.3333	3.02941	1.71045	0.619349	0.383842	0.351872	0.358477	-0.0333066
	SE	0.212378	0.116953	0.0559587	0.0341851	0.0267745	0.0200951	0.0204749	0.0304279
F-Statistics and Estimates of Nm over All Pops for each Locus
All Pops.	Locus	Fis	Fit	Fst		Nm
	N3	-0.143694	-0.115462	0.0246855		9.87741
	N6	0.0470673	0.202213	0.162808		1.28555
	N9	-0.132014	-0.00779453	0.109733		2.02825
	N10	-0.277602	-0.0374345	0.187983		1.07991
	Z13	-0.248135	-0.189791	0.0467448		5.09819
	N22	0.0239786	0.0508009	0.0274812		8.84713
	N24	0.215108	0.271262	0.0715437		3.24437
	Z31	-0.107938	0.170352	0.251178		0.74531
	Z32	0.387158	0.410189	0.0375797		6.40253
	Z33	0.393299	0.403313	0.0165056		14.8963
	Z36	-0.21418	-0.0163744	0.162913		1.28456
	Z38	-0.203689	-0.142646	0.0507134		4.67967
	N41	0.231516	0.271196	0.0516339		4.59178
	Z48	-0.0351768	0.0424704	0.0750086		3.08295
	Z50	-0.542542	-0.502889	0.025706		9.47535
	Z54	0.0606041	0.392839	0.353668		0.456877
	X70	0.0406391	0.27493	0.244216		0.773685
	Mean	-0.0297412	0.0868925	0.111771		4.5794
	SE	0.0596816	0.05997	0.0240818		0.998079
Percentage of Polymorphic Loci
Population	%P
GDX	0.764706
GCG	0.823529
FMM	1
FPK	0.941176
LLO	1
LCM	1
Mean	0.921569
SE	0.0420541
Na = No. of Different Alleles
Ne = No. of Effective Alleles = 1 / (Sum pi^2)
I = Shannon's Information Index = -1* Sum (pi * Ln (pi))
Ho = Observed Heterozygosity = No. of Hets / N
He = Expected Heterozygosity = 1 - Sum pi^2
uHe = Unbiased Expected Heterozygosity = (2N / (2N-1)) * He
F = Fixation Index = (He - Ho) / He = 1 - (Ho / He)
Where pi is the frequency of the ith allele for the population & Sum pi^2 is the sum of the squared population allele frequencies.
Fis = (Mean He - Mean Ho) / Mean He
Fit = (Ht - Mean Ho) / Ht
Fst = (Ht - Mean He) / Ht
Nm = [(1 / Fst) - 1] / 4
Key: Mean He = Average He across the populations. Mean Ho = Average Ho across the populations.
Ht = Total Expected Heterozygosity = 1 - Sum tpi^2 where tpi is the frequency of the ith allele for the total & Sum tpi^2 is the sum of the squared total allele frequencies.
Tip: Choose the Step by Step option to show Mean He, Mean Ho and Ht values.
Note:
Mean F-Statistics represent arithmetic averages. See G-Statistics for an alternative mean Fst estimate, calculated based on the average Hs and Ht over loci.

## Sheet: HFL
Heterozygosity, Fstatistics and Polymorphism by Locus for Codominant Data
Data Sheet	Sheet1
Data Title
No. Loci	17
No. Samples	164
No. Pops.	6
Sample Size, No. Alleles, No. Effective Alleles, Information Index, Observed Heterozygosity, Expected and Unbiased Expected Heterozygosity, and Fixation Index
Pop		N3	N6	N9	N10	Z13	N22	N24	Z31	Z32	Z33	Z36	Z38	N41	Z48	Z50	Z54	X70
GDX	N	29	29	29	29	29	29	29	29	29	29	29	29	29	29	29	29	29
	Na	4	1	2	1	4	3	1	3	2	3	2	2	1	2	4	2	2
	Ne	2.54079	1	1.78746	1	1.93556	2.13723	1	2.04623	1.31201	1.19038	1.18701	1.53327	1	1.10877	2.24267	1.62199	1.07134
	I	1.0904	0	0.632456	0	0.822871	0.879218	0	0.7969	0.40119	0.336811	0.293673	0.532096	0	0.203561	0.924826	0.571609	0.149995
	Ho	0.724138	0	0.586207	0	0.689655	0.37931	0	0.724138	0.275862	0.103448	0.172414	0.448276	0	0.103448	0.896552	0.517241	0.0689655
	He	0.606421	0	0.440547	0	0.483353	0.532105	0	0.511296	0.237812	0.159929	0.157551	0.3478	0	0.0980975	0.554102	0.383472	0.0665874
	uHe	0.61706	0	0.448276	0	0.491833	0.54144	0	0.520266	0.241984	0.162734	0.160315	0.353902	0	0.0998185	0.563823	0.3902	0.0677556
	F	-0.194118	#N/A	-0.330634	#N/A	-0.426814	0.287151	#N/A	-0.416279	-0.16	0.35316	-0.0943396	-0.288889	#N/A	-0.0545455	-0.618026	-0.348837	-0.0357143
GCG	N	26	26	26	26	26	26	26	26	26	26	26	26	26	26	26	26	26
	Na	3	4	2	1	3	3	1	4	3	3	2	3	1	3	4	2	2
	Ne	2.17713	1.99705	1.786	1	2.03922	2.67723	1	2.99778	1.37398	1.21692	1.07987	1.6795	1	1.31135	2.29542	1.786	1.69636
	I	0.915296	0.918393	0.631978	0	0.87635	1.0319	0	1.18312	0.535961	0.381262	0.163024	0.728905	0	0.450275	1.0549	0.631978	0.600768
	Ho	0.538462	0.423077	0.576923	0	0.692308	0.423077	0	0.730769	0.0769231	0.115385	0.0769231	0.5	0	0.269231	0.769231	0.346154	0.269231
	He	0.54068	0.49926	0.440089	0	0.509615	0.626479	0	0.66642	0.272189	0.178254	0.0739645	0.404586	0	0.237426	0.564349	0.440089	0.410503
	uHe	0.551282	0.50905	0.448718	0	0.519608	0.638763	0	0.679487	0.277526	0.18175	0.0754148	0.412519	0	0.242081	0.575415	0.448718	0.418552
	F	0.00410397	0.152593	-0.310924	#N/A	-0.358491	0.324675	#N/A	-0.0965594	0.717391	0.352697	-0.04	-0.235832	#N/A	-0.133956	-0.363041	0.213445	0.344144
FMM	N	29	29	29	29	29	29	29	29	29	29	29	29	29	29	29	29	29
	Na	3	3	2	2	3	3	3	5	2	3	2	4	4	5	5	2	3
	Ne	2.18442	1.45628	1.74844	1.10877	1.56465	2.46628	1.27521	3.06934	1.03508	1.32755	1.18701	1.28397	1.15127	1.82232	2.95606	1.62199	1.68032
	I	0.925074	0.543498	0.619376	0.203561	0.628323	0.99718	0.417794	1.21075	0.0870995	0.49244	0.293673	0.489499	0.32266	0.932456	1.24886	0.571609	0.701024
	Ho	0.689655	0.275862	0.413793	0.103448	0.448276	0.724138	0.172414	0.689655	0.0344828	0.137931	0.172414	0.241379	0.0689655	0.206897	1	0.241379	0.37931
	He	0.542212	0.313317	0.428062	0.0980975	0.36088	0.59453	0.215815	0.674197	0.0338882	0.24673	0.157551	0.221165	0.131391	0.451249	0.661712	0.383472	0.404875
	uHe	0.551724	0.318814	0.435572	0.0998185	0.367211	0.604961	0.219601	0.686025	0.0344828	0.251059	0.160315	0.225045	0.133696	0.459165	0.673321	0.3902	0.411978
	F	-0.27193	0.119545	0.0333333	-0.0545455	-0.242175	-0.218	0.201102	-0.0229277	-0.0175439	0.440964	-0.0943396	-0.0913978	0.475113	0.541502	-0.511231	0.370543	0.0631424
FPK	N	26	26	26	26	26	26	26	26	26	26	26	26	26	26	26	26	26
	Na	3	3	6	2	3	3	1	4	2	4	3	3	2	2	5	2	3
	Ne	2.19481	1.94532	3.2114	1.82703	1.31135	2.4186	1	1.12479	1.0392	1.2671	2.27993	1.36842	1.07987	1.16552	2.704	1.21038	2.48987
	I	0.925129	0.800997	1.40836	0.645033	0.450275	0.982524	0	0.283952	0.0950301	0.457731	0.903787	0.515836	0.163024	0.271189	1.18865	0.316549	0.984393
	Ho	0.615385	0.538462	0.653846	0.538462	0.269231	0.653846	0	0.115385	0.0384615	0.0769231	0.653846	0.307692	0	0.153846	0.961538	0.192308	0.576923
	He	0.544379	0.485947	0.688609	0.452663	0.237426	0.586538	0	0.110947	0.0377219	0.210799	0.561391	0.269231	0.0739645	0.142012	0.630178	0.173817	0.598373
	uHe	0.555053	0.495475	0.702112	0.461538	0.242081	0.598039	0	0.113122	0.0384615	0.214932	0.572398	0.27451	0.0754148	0.144796	0.642534	0.177225	0.610106
	F	-0.130435	-0.108067	0.0504834	-0.189542	-0.133956	-0.114754	#N/A	-0.04	-0.0196078	0.635088	-0.16469	-0.142857	1	-0.0833333	-0.525822	-0.106383	0.0358467
LLO	N	30	30	30	30	30	30	30	30	30	30	30	30	30	30	30	30	30
	Na	3	4	2	2	4	4	4	5	3	4	3	3	4	6	4	2	3
	Ne	2.27273	2.06659	1.76298	1.68382	1.31868	2.51748	1.45749	1.86335	1.35034	1.31868	2.33161	1.52931	1.40296	2.01794	2.56046	1.68382	1.92308
	I	0.891867	0.855545	0.624331	0.596074	0.522583	1.0585	0.615661	0.969514	0.475034	0.522583	0.951703	0.581414	0.557067	1.00132	1.11861	0.596074	0.803315
	Ho	0.666667	0.533333	0.566667	0.566667	0.266667	0.7	0.2	0.5	0.1	0.1	0.766667	0.433333	0.333333	0.566667	0.9	0.366667	0.533333
	He	0.56	0.516111	0.432778	0.406111	0.241667	0.602778	0.313889	0.463333	0.259444	0.241667	0.571111	0.346111	0.287222	0.504444	0.609444	0.406111	0.48
	uHe	0.569492	0.524859	0.440113	0.412994	0.245763	0.612994	0.319209	0.471186	0.263842	0.245763	0.580791	0.351977	0.29209	0.512994	0.619774	0.412994	0.488136
	F	-0.190476	-0.0333692	-0.309371	-0.395349	-0.103448	-0.16129	0.362832	-0.0791367	0.614561	0.586207	-0.342412	-0.252006	-0.160542	-0.123348	-0.476755	0.0971272	-0.111111
LCM	N	24	24	24	24	24	24	24	24	24	24	24	24	24	24	24	24	24
	Na	4	5	6	2	5	2	4	4	2	3	3	3	4	5	4	2	3
	Ne	2.38509	2.57718	2.2544	1.91681	1.49223	1.91681	1.18641	1.48837	1.18033	1.34109	1.7916	1.13498	1.24004	2.02817	2.1573	1.13274	2.7759
	I	1.03573	1.17047	1.01386	0.671286	0.72835	0.671286	0.373479	0.688567	0.286836	0.475222	0.697627	0.273574	0.44403	0.929863	0.862725	0.233792	1.05869
	Ho	0.625	0.541667	0.583333	0.625	0.333333	0.458333	0.166667	0.291667	0.0833333	0.25	0.541667	0.125	0.125	0.708333	0.958333	0.125	0.666667
	He	0.580729	0.611979	0.556424	0.478299	0.329861	0.478299	0.157118	0.328125	0.152778	0.25434	0.44184	0.118924	0.193576	0.506944	0.536458	0.117188	0.639757
	uHe	0.593085	0.625	0.568262	0.488475	0.336879	0.488475	0.160461	0.335106	0.156028	0.259752	0.451241	0.121454	0.197695	0.51773	0.547872	0.119681	0.653369
	F	-0.0762332	0.114894	-0.0483619	-0.306715	-0.0105263	0.0417423	-0.0607735	0.111111	0.454545	0.0170648	-0.225933	-0.0510949	0.35426	-0.39726	-0.786408	-0.0666667	-0.0420624
Mean and SE over Pops for each Locus
		N3	N6	N9	N10	Z13	N22	N24	Z31	Z32	Z33	Z36	Z38	N41	Z48	Z50	Z54	X70
N	Mean	27.3333	27.3333	27.3333	27.3333	27.3333	27.3333	27.3333	27.3333	27.3333	27.3333	27.3333	27.3333	27.3333	27.3333	27.3333	27.3333	27.3333
	SE	0.954521	0.954521	0.954521	0.954521	0.954521	0.954521	0.954521	0.954521	0.954521	0.954521	0.954521	0.954521	0.954521	0.954521	0.954521	0.954521	0.954521
Na	Mean	3.33333	3.33333	3.33333	1.66667	3.66667	3	2.33333	4.16667	2.33333	3.33333	2.5	3	2.66667	3.83333	4.33333	2	2.66667
	SE	0.210819	0.557773	0.843274	0.210819	0.333333	0.258199	0.614636	0.307318	0.210819	0.210819	0.223607	0.258199	0.614636	0.703167	0.210819	0	0.210819
Ne	Mean	2.29249	1.8404	2.09178	1.42274	1.61028	2.3556	1.15318	2.09831	1.21516	1.27695	1.64284	1.42158	1.14569	1.57568	2.48598	1.50949	1.93948
	SE	0.0592019	0.222364	0.237494	0.17623	0.126517	0.113445	0.0772424	0.322988	0.0625788	0.0255678	0.233445	0.0805213	0.0637457	0.17486	0.126175	0.110085	0.250516
I	Mean	0.963916	0.714817	0.821728	0.352659	0.671459	0.936768	0.234489	0.855467	0.313525	0.444341	0.550581	0.52022	0.247797	0.631443	1.06643	0.486935	0.716364
	SE	0.0325184	0.164985	0.133266	0.131304	0.0685783	0.0587098	0.110025	0.141951	0.0780959	0.0289309	0.140176	0.0603414	0.0948249	0.148566	0.0612705	0.0684108	0.133036
Ho	Mean	0.643218	0.3854	0.563462	0.305596	0.449912	0.556451	0.0898467	0.508602	0.10151	0.130615	0.397322	0.342613	0.0878831	0.334737	0.914276	0.298125	0.415738
	SE	0.0266676	0.0878792	0.0324929	0.122752	0.0808394	0.0624515	0.0404432	0.104936	0.0364251	0.0252299	0.119287	0.0585914	0.0532765	0.100036	0.0332062	0.0575634	0.0905202
He	Mean	0.562403	0.404436	0.497751	0.239195	0.360467	0.570122	0.11447	0.459053	0.165639	0.215286	0.327235	0.284636	0.114359	0.323362	0.592707	0.317358	0.433349
	SE	0.010776	0.0900097	0.043029	0.0939746	0.0474467	0.0223492	0.0551264	0.0876272	0.0444402	0.0159852	0.0911355	0.0423805	0.0462727	0.0761282	0.0199201	0.0554841	0.0832386
uHe	Mean	0.572949	0.4122	0.507175	0.243804	0.367229	0.580779	0.116545	0.467532	0.168721	0.219332	0.333412	0.289901	0.116483	0.329431	0.60379	0.32317	0.441649
	SE	0.0109596	0.0918187	0.0440616	0.0958315	0.0483331	0.0226202	0.0560862	0.0891817	0.0452411	0.0163034	0.0928588	0.0431286	0.0471002	0.077551	0.0201001	0.0564283	0.0849655
F	Mean	-0.143181	0.0491189	-0.152579	-0.236538	-0.212568	0.0265873	0.16772	-0.090632	0.264891	0.39753	-0.160286	-0.177013	0.417208	-0.0418236	-0.54688	0.0265381	0.0423742
	SE	0.0398936	0.0463252	0.0748375	0.060312	0.0650587	0.0952327	0.0872698	0.0716615	0.153214	0.0899355	0.0449687	0.0391373	0.194473	0.126968	0.058556	0.104166	0.0654024
Grand Mean and SE over Pops and Loci
		Total
N	Mean	27.3333
	SE	0.212378
Na	Mean	3.02941
	SE	0.116953
Ne	Mean	1.71045
	SE	0.0559587
I	Mean	0.619349
	SE	0.0341851
Ho	Mean	0.383842
	SE	0.0267745
He	Mean	0.351872
	SE	0.0200951
uHe	Mean	0.358477
	SE	0.0204749
F	Mean	-0.0333066
	SE	0.0304279
F-Statistics and Estimates of Nm over All Pops for each Locus
All Pops.		N3	N6	N9	N10	Z13	N22	N24	Z31	Z32	Z33	Z36	Z38	N41	Z48	Z50	Z54	X70	Mean	SE
	Fis	-0.143694	0.0470673	-0.132014	-0.277602	-0.248135	0.0239786	0.215108	-0.107938	0.387158	0.393299	-0.21418	-0.203689	0.231516	-0.0351768	-0.542542	0.0606041	0.0406391	-0.0297412	0.0596816
	Fit	-0.115462	0.202213	-0.00779453	-0.0374345	-0.189791	0.0508009	0.271262	0.170352	0.410189	0.403313	-0.0163744	-0.142646	0.271196	0.0424704	-0.502889	0.392839	0.27493	0.0868925	0.05997
	Fst	0.0246855	0.162808	0.109733	0.187983	0.0467448	0.0274812	0.0715437	0.251178	0.0375797	0.0165056	0.162913	0.0507134	0.0516339	0.0750086	0.025706	0.353668	0.244216	0.111771	0.0240818
	Nm	9.87741	1.28555	2.02825	1.07991	5.09819	8.84713	3.24437	0.74531	6.40253	14.8963	1.28456	4.67967	4.59178	3.08295	9.47535	0.456877	0.773685	4.5794	0.998079
Percentage of Polymorphic Loci
Population	%P
GDX	0.764706
GCG	0.823529
FMM	1
FPK	0.941176
LLO	1
LCM	1
Mean	0.921569
SE	0.0420541
Na = No. of Different Alleles
Ne = No. of Effective Alleles = 1 / (Sum pi^2)
I = Shannon's Information Index = -1* Sum (pi * Ln (pi))
Ho = Observed Heterozygosity = No. of Hets / N
He = Expected Heterozygosity = 1 - Sum pi^2
uHe = Unbiased Expected Heterozygosity = (2N / (2N-1)) * He
F = Fixation Index = (He - Ho) / He = 1 - (Ho / He)
Where pi is the frequency of the ith allele for the population & Sum pi^2 is the sum of the squared population allele frequencies.
Fis = (Mean He - Mean Ho) / Mean He
Fit = (Ht - Mean Ho) / Ht
Fst = (Ht - Mean He) / Ht
Nm = [(1 / Fst) - 1] / 4
Key: Mean He = Average He across the populations. Mean Ho = Average Ho across the populations.
Ht = Total Expected Heterozygosity = 1 - Sum tpi^2 where tpi is the frequency of the ith allele for the total & Sum tpi^2 is the sum of the squared total allele frequencies.
Tip: Choose the Step by Step option to show Mean He, Mean Ho and Ht values.
Note:
Mean F-Statistics represent arithmetic averages. See G-Statistics for an alternative mean Fst estimate, calculated based on the average Hs and Ht over loci.

## Sheet: APT
Allelic Patterns for Codominant Data
Data Sheet	Sheet1
Data Title
No. Loci	17
No. Samples	164
No. Pops.	6
Mean Allelic Patterns Across Populations
Mean values
Population	GDX	GCG	FMM	FPK	LLO	LCM
Na	2.29412	2.58824	3.17647	3	3.52941	3.58824
Na Freq. >= 5%	1.88235	2.29412	2.35294	2.29412	2.70588	2.23529
Ne	1.51263	1.71258	1.70229	1.74339	1.82714	1.76467
I	0.449153	0.594359	0.628522	0.611321	0.749482	0.683258
No. Private Alleles	0	0	0.0588235	0.117647	0.0588235	0.235294
No. LComm Alleles (<=25%)	0	0	0	0	0	0
No. LComm Alleles (<=50%)	0.117647	0.352941	0.411765	0.470588	0.470588	0.352941
He	0.269357	0.344936	0.348185	0.341411	0.426013	0.381332
uHe	0.274083	0.351699	0.354293	0.348106	0.433234	0.389445
Standard Error (SE) values
Population	GDX	GCG	FMM	FPK	LLO	LCM
Na	0.253863	0.243426	0.260589	0.297044	0.258924	0.297771
Na Freq. >= 5%	0.168958	0.223026	0.170233	0.238942	0.205882	0.219113
Ne	0.124127	0.145805	0.151272	0.167968	0.100851	0.130821
I	0.0885825	0.0934252	0.0817434	0.0991938	0.0522684	0.0725309
No. Private Alleles	0	0	0.0588235	0.117647	0.0588235	0.136377
No. LComm Alleles (<=25%)	0	0	0	0	0	0
No. LComm Alleles (<=50%)	0.0805474	0.147059	0.192866	0.174002	0.193984	0.147059
He	0.0543229	0.0549391	0.0475259	0.0571139	0.0307531	0.0449961
uHe	0.055276	0.0560163	0.0483597	0.0582338	0.0312743	0.0459535
Na = No. of Different Alleles
Na (Freq >= 5%) = No. of Different Alleles with a Frequency >= 5%
Ne = No. of Effective Alleles = 1 / (Sum pi^2)
I = Shannon's Information Index = -1* Sum (pi * Ln (pi))
No. Private Alleles = No. of Alleles Unique to a Single Population
No. LComm Alleles (<=25%) = No. of Locally Common Alleles (Freq. >= 5%) Found in 25% or Fewer Populations
No. LComm Alleles (<=50%) = No. of Locally Common Alleles (Freq. >= 5%) Found in 50% or Fewer Populations
He = Expected Heterozygosity = 1 - Sum pi^2
uHe = Unbiased Expected Heterozygosity = (2N / (2N-1)) * He

[truncated: 7 more sheets: ALI, PAS, PAL, NeiP, NeiT, FstP, FstT]
